1  
2  
3  
4  
5  
6  
7  
8  
9  
10  
11  
12  
13  
14  
15  
16  
17  
18  
19  
20  
21  
22

## Quantifying transmission of emerging zoonoses:

### Using mathematical models to maximize the value of surveillance data

Monique R. Ambrose<sup>1</sup>, Adam J. Kucharski<sup>2,3</sup>, Pierre Formenty<sup>4</sup>, Jean-Jacques Muyembe-Tamfum<sup>5</sup>, Anne W. Rimoin<sup>6</sup>, and James O. Lloyd-Smith<sup>1,3\*</sup>

<sup>1</sup> Department of Ecology and Evolutionary Biology, University of California, Los Angeles

<sup>2</sup> London School of Hygiene and Tropical Medicine

<sup>3</sup> Fogarty International Center, National Institutes of Health, Bethesda, MD

<sup>4</sup> World Health Organization, Geneva, Switzerland

<sup>5</sup> Democratic Republic of the Congo National Institute for Biomedical Research

<sup>6</sup> Department of Epidemiology, University of California, Los Angeles

\* Corresponding author

E-mail: [jloydsmith@ucla.edu](mailto:jloydsmith@ucla.edu) (JOL-S)

## 23 **Abstract**

24           Understanding and quantifying the transmission of zoonotic pathogens is essential for  
25 directing public health responses, especially for pathogens capable of transmission between  
26 humans. However, determining a pathogen's transmission dynamics is complicated by  
27 challenges often encountered in zoonotic disease surveillance, including unobserved sources of  
28 transmission (both human and zoonotic), limited spatial information, and unknown scope of  
29 surveillance. In this work, we present a model-based inference method that addresses these  
30 challenges for subcritical zoonotic pathogens using a spatial model with two levels of mixing.  
31 After demonstrating the robustness of the method using simulation studies, we apply the new  
32 method to a dataset of human monkeypox cases detected during an active surveillance program  
33 from 1982-1986 in the Democratic Republic of the Congo (DRC). Our results provide estimates  
34 of the reproductive number and spillover rate of monkeypox during this surveillance period and  
35 suggest that most human-to-human transmission events occur over distances of 30km or less.  
36 Taking advantage of contact-tracing data available for a subset of monkeypox cases, we find that  
37 around 80% of contact-traced links could be correctly recovered from transmission trees inferred  
38 using only date and location. Our results highlight the importance of identifying the appropriate  
39 spatial scale of transmission, and show how even imperfect spatiotemporal data can be  
40 incorporated into models to obtain reliable estimates of human-to-human transmission patterns.

## 41 **Author Summary**

42           Surveillance datasets are often the only sources of information about the ecology and  
43 epidemiology of zoonotic infectious diseases. Methods that can extract as much information as  
44 possible from these datasets therefore provide a key advantage for informing our understanding

45 of the disease dynamics and improving our ability to choose the optimal intervention strategy.  
46 We developed and tested a likelihood-based inference method based on a mechanistic model of  
47 the spillover and human-to-human transmission processes. We first used simulated datasets to  
48 explore which information about the disease dynamics of a subcritical zoonotic pathogen could  
49 be successfully extracted from a line-list surveillance dataset with non-localized spatial  
50 information and unknown geographic coverage. We then applied the method to a dataset of  
51 human monkeypox cases detected during an active surveillance program in the Democratic  
52 Republic of the Congo between 1982 and 1986 to obtain estimates of the reproductive number,  
53 spillover rate, and spatial dispersal of monkeypox in humans.

## 54 **Introduction**

55 Many recent infectious disease threats have been caused by pathogens with zoonotic  
56 origins, including Ebola, pandemic H1N1 influenza, and SARS- and MERS- Coronaviruses, and  
57 zoonotic pathogens are expected to be a primary source of future emerging infectious diseases  
58 [1–8]. By definition, zoonotic pathogens can transmit from animals to humans; those also  
59 capable of human-to-human transmission are of particular public health concern [5,9]. Infectious  
60 disease surveillance serves a crucial role for detecting and gathering information on zoonotic  
61 pathogens: data obtained through surveillance are often the primary resource available for  
62 informing public health management decisions [10]. Developing methods that improve our  
63 ability to infer information about a pathogen’s transmission dynamics from available  
64 surveillance data is therefore an essential frontier for understanding and ultimately combating  
65 these pathogens [11,12].

66 For zoonoses, three epidemiological measures are crucial for summarizing transmission  
67 dynamics and informing risk assessments. The first of these is the spillover rate, which indicates  
68 how frequently the pathogen is transmitted from the animal reservoir into humans and helps  
69 inform the total expected disease incidence [13]. The second measure describes the pathogen's  
70 potential for further spread once in the human population and is commonly assessed using the  
71 reproductive number ( $R$ ), which gives the average number of secondary human cases caused by  
72 an infectious individual [14,15]. Values of  $R$  greater than one indicate that the pathogen is  
73 capable of sustained (i.e. 'supercritical') transmission in humans. Pathogens with subcritical  
74 transmission ( $R$  less than one but greater than zero) can cause limited chains of transmission in  
75 humans after a zoonotic introduction, and they pose a risk of acquiring ability for supercritical  
76 transmission via evolutionary or environmental change [2,5,16]. The third epidemiological  
77 measure is the distance over which human-to-human transmission occurs, which informs how  
78 the disease will spread spatially and the risk of it being introduced into new populations.  
79 Combined, these three measures can help evaluate the current public health threat posed by the  
80 pathogen, the risk of future emergence, and the most effective approaches for disease  
81 management.

82 Estimating epidemiological measures is a challenging task in any pathogen system, and  
83 the unique properties of zoonotic diseases can exacerbate these difficulties. Infectious disease  
84 surveillance often records temporal information and certain aspects of spatial information about  
85 human cases, but the underlying transmission events are seldom observed. In a zoonotic system,  
86 this means that an observed human infection could have been caused by a previous human case  
87 or by zoonotic spillover. Without intensive contact tracing, or sequence data in the case of fast-  
88 evolving pathogens, quantifying the relative contribution of zoonotic versus human-to-human

89 transmission is a major challenge; identifying the source of infection for specific individuals is  
90 an even bigger one.

91         Epidemiological analyses are often hindered by data truncation and unknown  
92 denominators [17,18]. In many disease surveillance systems, the total set of localities under  
93 surveillance (i.e. those that would appear in the dataset if a case occurred there) can be separated  
94 into ‘observed localities,’ which appear in the dataset because they reported one or more cases,  
95 and ‘silent localities,’ which have no cases during the surveillance period and therefore do not  
96 appear in the dataset. This form of truncation, where localities with zero cases are absent from  
97 the dataset, obscures the true scope of the surveillance effort. Without knowledge of the total  
98 number of localities under observation (the ‘unknown denominator’), accurately estimating the  
99 spillover rate and probability of human-to-human transmission between localities is not  
100 straightforward. Simply disregarding these silent localities in the analysis is the functional  
101 equivalent of selectively removing zeros from the dataset and can lead to problematic inference  
102 biases.

103         Complicating inference efforts further is the fact that surveillance datasets often report  
104 the geographic location of cases only at a coarse resolution, obscuring information about a  
105 transmission process that occurs on a much finer scale [19–21]. Precise spatial information is  
106 often absent from historic datasets and data collected in remote or low-resource areas, replaced  
107 by the names of the locality and broader administrative units where the case occurred. For  
108 example, only the village name and the region and country to which the village belongs may be  
109 recorded in a dataset. Furthermore, linking a village name to spatial coordinates is often  
110 impossible when maps of the region do not exist or only unofficial local names are used.  
111 Although collecting exact spatial coordinates has become more practical in contemporary disease

112 surveillance, privacy and confidentiality concerns can arise in both human and agricultural  
113 contexts when data contains high-resolution spatial information [19,20,22–25], leading to data  
114 being reported in a non-localized manner. Methods that can use this inexact spatial information  
115 are especially needed for zoonotic diseases, where any additional information about the  
116 proximity of human cases to one another can improve the power to distinguish between human-  
117 to-human transmission and zoonotic spillover.

118         Despite these challenges, a series of research efforts have expanded our ability to  
119 estimate the transmission properties of zoonotic pathogens from case onset data. A key set of  
120 methods revolve around inferring  $R$  from the sizes of case clusters (a cluster is defined as a group  
121 of cases that occur in close spatiotemporal proximity to one another) or from the proportion of  
122 observed cases that were infected by zoonotic spillover [16,26–30]. However, these approaches  
123 either require detailed case investigations to determine whether a case was infected by a zoonotic  
124 or human source or assume that each cluster is caused by one single spillover event followed by  
125 human-to-human transmission. A likelihood-based approach for estimating  $R$  for human-to-  
126 human transmission using only symptom onset dates of cases was introduced by Wallinga and  
127 Teunis [31]. This method was extended to apply to zoonotic systems by Lo Iacono et al. [32], but  
128 the extension requires that chains of exclusively human-to-human transmission can be identified,  
129 and is thus not applicable to many zoonotic surveillance systems where human and zoonotic  
130 transmissions are intermixed. A different approach was taken by White and Pagano [33], who  
131 introduced a different likelihood-based method that compares the observed number of cases on  
132 each day with the expected number, as calculated using the number and timing of previous cases.  
133 Though the White and Pagano approach was only applicable to human-to-human transmission, it  
134 was expanded by Kucharski et al. [34] to work in zoonotic spillover systems in scenarios where a

135 control measure, implemented at a known point in time, causes an abrupt reduction in spillover.  
136 A related approach that requires knowledge of the human and animal reservoir population sizes  
137 was also explored in Lo Iacono et al. [35]. Crucially, however, none of these methods  
138 incorporate information about the spatial location of cases to improve inference power or to  
139 estimate patterns of spatial spread. Spatial data is a powerful tool in transmission inference in  
140 single-species studies (e.g. [36–39]), but has largely been excluded from analyses of zoonotic  
141 transmission, which often implicitly assume homogenous mixing across the study area or that  
142 human-to-human transmission can only occur within a locality. One recent exception to this is  
143 the analysis by Cauchemez et al. [40], which includes transmission at several spatial levels.

144 In this work, we present model-based inference methods that allow us to infer  $R$ , the  
145 spillover rate, and properties of spatial spread among humans from surveillance datasets with  
146 non-localized spatial information and an unknown total number of surveilled localities. Our  
147 approach builds on methods introduced by White and Pagano [33] and Kucharski et al. [34], but  
148 allows continuous spillover throughout the surveillance period and makes use of available spatial  
149 information on case location. While the method could be readily adjusted to incorporate more  
150 precise geographic information should it be available, in this study we focus on the more  
151 challenging scenario in which only the names of the locality and broader administrative units  
152 where a case occurred are known. To make use of this form of non-localized spatial data, our  
153 model considers two scales of spatial mixing and transmission (Fig 1A), reminiscent of the  
154 ‘epidemics with two levels of mixing’ structure utilized in Ball et al. [41] and Demiris and  
155 O’Neill [42]. The first mixing level is the locality in which the case occurred, such as a village,  
156 conceptualized as a group of individuals geographically separated from other localities. We  
157 assume that individuals within the same locality have more frequent contact with one another

158 than with individuals from other localities, and therefore that infection is more likely to be  
159 transmitted within a locality. However, the total number of localities under surveillance is  
160 unknown because only localities with one or more cases appear in the dataset (the ‘unknown  
161 denominator’ problem discussed above). We refer to the second spatial level as the ‘broader  
162 contact zone.’ It describes a collection of localities that all occur within the same administrative  
163 unit and likely share some amount of human movement. When multiple types of administrative  
164 units of different sizes are reported in the dataset (e.g., districts, regions, provinces, etc.), the  
165 ideal choice for broader contact zone is the smallest administrative unit that contains inter-  
166 locality human-to-human transmission events. If this scale is not known *a priori*, inferring the  
167 appropriate scale of administrative unit is necessary.

168

169 **Fig 1. Model schematic. A.** The schematic illustrates the spatial scales considered in the model  
170 and the types of transmission that occurs at different scales. Human cases are represented in  
171 black if they were infected by zoonotic spillover, blue if they were infected by within-locality  
172 human-to-human transmission, and orange if infected by between-locality human-to-human  
173 transmission. Individuals who are not infected are colored gray and do not appear in the  
174 surveillance dataset. Similarly, if zero individuals in a locality are infected, that ‘silent locality’  
175 does not appear in the dataset (represented by the gray locality in the broader contact zone). **B.**  
176 The possible sources of human infection, which in aggregate determine the number of new  
177 infections on day  $t$ , locality  $v$ . The number of cases arising from spillover and human-to-human  
178 transmissions follow Poisson distributions with means  $\lambda_Z$  and  $\lambda_{\{s,w\},\{t,v\}}$ , respectively.

179



180 We tested the method against a variety of datasets simulated using different  
181 epidemiological parameters, offspring distributions for human-to-human transmission, and  
182 spatial transmission kernels. To assess the performance of the method, we compared the  
183 estimated and true values for epidemiological measures such as the reproductive number and  
184 spillover rate, and also examined how well the method was able to estimate the probable  
185 transmission source of each case. When silent localities were not accounted for, substantial  
186 biases arose in zoonotic spillover rate estimates. However, a modified method that accounts for  
187 these silent localities was successful in a wide range of circumstances. We therefore applied this  
188 ‘corrected-denominator method’ to a dataset on human monkeypox cases from an active  
189 surveillance effort conducted in the Democratic Republic of the Congo (formerly Zaire) in the  
190 1980s [43] (Fig 2). Gaining insights to the disease dynamics of human monkeypox is particularly  
191 relevant given the recent increase in monkeypox incidence and outbreaks and the growing list of  
192 countries and regions reporting human monkeypox cases [44–51]. Using the high-coverage  
193 1980s surveillance dataset to quantify the pathogen’s transmission dynamics will improve our  
194 understanding of what drives its spread and lays the groundwork to assess what has changed over  
195 the past decades to give rise to observed increases. With the 1980s monkeypox surveillance  
196 dataset, we repeated the analyses using four different assumptions about the appropriate spatial  
197 scale to represent the ‘broader contact zone’ over which human-to-human transmissions take  
198 place and selected the preferred option using the deviance information criterion (DIC) method  
199 for model comparison. In the monkeypox dataset, contact-tracing data are available for a subset  
200 of the cases, providing a rare opportunity to compare inferred transmission sources with those  
201 suggested by epidemiological investigation. In addition, some localities were associated with  
202 known GPS coordinates, enabling us to estimate the spatial transmission kernel in greater detail.

203 As such, our monkeypox analysis yielded estimates of  $R$  and the spillover rate during the 1980s  
204 surveillance period, as well as insights into the spatial scale of human transmission of  
205 monkeypox.

206

207 **Fig 2. Map and time-series showing locations and dates of human monkeypox cases.** The  
208 size of points on the map indicate the number of cases and the color of points corresponds to the  
209 region in which the cases occurred. Dark lines indicate region boundaries while light lines  
210 indicate the official boundaries for districts (though in the monkeypox surveillance dataset these  
211 are sometimes further divided into administrative subregions).

212

## 213 **Results**

### 214 **Overview of the approach**

215 We first validated the inference framework using a simulation study, then applied the  
216 validated method to a dataset on human monkeypox cases to estimate key epidemiological  
217 parameters and the spatial scale of transmission. To generate simulated test datasets and perform  
218 parameter inference, we used a mathematical model of the zoonotic pathogen's transmission into  
219 and among humans. The model tracks the number of human cases that occur in each locality on  
220 each day; infections can arise from spillover from the zoonotic reservoir or from human-to-  
221 human transmission (Fig 1B). Three key parameters govern the behavior of the system. The  
222 spillover rate ( $\lambda_z$ ) describes the average number of human cases caused by animal-to-human  
223 transmission ('primary cases') in each locality per day. The reproductive number of the pathogen

224 ( $R$ ) determines the average number of (‘secondary’) cases caused by each infected human. And  
225 the spatial dispersal of the pathogen is controlled by the fraction of cases arising from human-to-  
226 human transmission that occur in the same locality as the source case ( $\sigma$ ) and the rules governing  
227 inter-locality transmission events. Two spatial scales of transmission are included in the model:  
228 within the locality of the case and between localities in the same broader contact zone. Using this  
229 model (described further in Methods 4.1) and values for the three parameters, the likelihood of  
230 observing  $N_{t,v}$  cases on each day  $t$  and locality  $v$  can be calculated. Markov chain Monte Carlo  
231 (MCMC) methods were used to infer posterior parameter distributions for a given dataset of  
232 cases.

### 233 **Robustness of model-based inference method**

234 **Basic method (assumes the total number of localities under surveillance is known).** To  
235 assess the accuracy and precision of our method’s estimates of spillover and transmission  
236 parameters, we simulated datasets with known parameter values and compared these true values  
237 with the inferred values. We investigated a range of  $R$  and  $\lambda_z$  values in the neighborhood of  
238 values previously estimated for monkeypox [16,52], with  $R$  ranging from 0.2 to 0.6 and  $\lambda_z$   
239 ranging from 0.0001 to 0.0007 expected spillover events per locality per day ( $\lambda_z$  values  
240 correspond to 59 to 415 expected spillover events in the five year simulation period, across all  
241 localities). Transmission events between humans had a probability  $\sigma=0.75$  of occurring within a  
242 locality and otherwise were equally likely between any localities in the same broader contact  
243 zone. We were interested in seeing how well the inference methods are able to use the spatial-  
244 temporal arrangement of cases to estimate the true parameter values.

245           Across 125 simulations (25 simulations for each of five parameter sets), estimated values  
246 clustered around the true parameter values. The true value for  $R$  was included in the 95%  
247 credible interval (CI) 119 times (95.2%) and for  $\lambda_z$  was included 121 times (96.8%) (Fig 3A). On  
248 average, the posterior mean estimate of  $R$  differed from the true value by 8.6%; the analogous  
249 percent errors for  $\lambda_z$  and  $\sigma$  estimates were 6.3% and 7.0%, respectively (S1 Table).

250

251 **Fig 3. Comparison of true and inferred parameter values in simulation study.** Within each  
252 color, large points outlined in black indicate the true parameter set and smaller points indicate the  
253 inferred parameter values from simulated datasets (lines show the 95% credible interval).  
254 Inferences were performed **A)** when the true number of localities under surveillance was known,  
255 **B)** when the true number was unknown and it was assumed that the number of observed  
256 localities was the total number of localities, and **C)** when the true number of localities was  
257 unknown and the corrected-denominator method was used to control for the locality observation  
258 process.

259

260           However, this method assumes that the true number of localities under surveillance is  
261 known. In real-world situations, ‘silent’ localities that experience zero cases often do not appear  
262 in the dataset, resulting in an unknown true number of surveilled localities. We investigated  
263 possible biases in parameter estimates that could arise from assuming that the number of  
264 localities that reported one or more cases represents the total number of localities under  
265 surveillance. To do so, we used the same set of simulated datasets as described above, but  
266 removed knowledge about the number of silent localities. In these datasets, silent localities make

267 up between 21% and 85% of all localities under surveillance, with the proportion driven  
268 primarily by the spillover rate. Estimates for the reproductive number  $R$  were not strongly  
269 impacted (95.2% of the 95% CIs contained the true value with an average percent error of 8.4%),  
270 but the spillover rate  $\lambda_z$  was consistently overestimated (Fig 3B). The true value for  $\lambda_z$  was  
271 contained in none of the simulations' 95% CIs and the posterior mean had an average percent  
272 error of 153% (S1 Table).

273 To further investigate the effect of this data truncation (whereby localities with zero cases  
274 do not appear in the dataset), we performed inference assuming that the observed localities  
275 represented all, 1/2, or 1/5 of the total localities under surveillance. While this assumption had a  
276 relatively small impact on the estimated  $R$ , it greatly impacted the inferred  $\lambda_z$  (which is measured  
277 as the number of spillover events *per locality* per day and is therefore strongly affected by  
278 changes in the assumed number of localities) (S1 Fig). Assuming that a larger fraction of  
279 surveilled localities appear in the dataset resulted in substantially higher estimated spillover  
280 rates.

281 **Corrected-denominator method (conditions on the locality observation process).** Because  
282 the total number of localities assumed to be under surveillance has a substantial impact on  
283 parameter estimates, we developed a modified version of the likelihood function that accounts  
284 for localities that were under surveillance but never observed in the dataset. This approach  
285 calculates the likelihood of the observed dataset conditional on the fact that only localities with  
286 one or more cases are included (details on the modified likelihood function can be found in  
287 Methods and S1 Text).

288 We tested the performance of the corrected-denominator method against simulated  
289 datasets, looking at the same parameter sets as in the first section. The inferred parameter values  
290 cluster well with their corresponding true values (Fig 3C): mean percent error in  $R$  estimates was  
291 8.4% and in  $\lambda_z$  estimates was 14.0%. Across the 125 simulations, the true parameter value was  
292 included in the 95% CI 116 times (92.8%) for  $R$  and 117 times (93.6%) for  $\lambda_z$  (S1 Table).

293 Because an estimate of the true number of localities under surveillance would help  
294 determine the size of the population that could be detected for a given system, we assessed how  
295 well we could approximate this value. Given the number of localities with one or more cases and  
296 the mean parameter estimates, it is possible to calculate the expected total number of localities  
297 under surveillance (see S1 Text). Estimates of the true number of localities calculated for the  
298 simulated datasets center on the correct value (S2 Fig). The magnitude of estimate error is driven  
299 by the spillover rate, which largely determines the proportion of localities that are observed by  
300 surveillance. The mean percent error across simulations with spillover rate of 0.0001, 0.00036,  
301 and 0.0007 were 25.4%, 7.9%, and 2.4%, respectively, while simulations with spillover rates of  
302 0.004 and above almost always recorded at least one case in each locality during the five year  
303 surveillance period and therefore tended to estimate the exact true number of localities.

304 **Inferring the sources of transmission events.** We investigated how well sampled transmission  
305 trees recovered the source of individual cases as well as higher-order measures, such as the  
306 fraction of cases originating from zoonotic, within-locality, and between-locality transmission.  
307 We tested our method using 125 simulated datasets, with 25 datasets simulated for each of five  
308 sets of true parameter values (these are the same datasets as discussed above, simulated with  $R$   
309 between 0.2 and 0.6 and spillover rate between 0.0001 and 0.0007). Two hundred plausible  
310 transmission trees were sampled for each simulated dataset.

311           When comparing the overall fraction of cases attributed to each source type (zoonotic  
312 versus within-locality versus between-locality transmission), the sampled transmission trees  
313 closely match the true transmission patterns (Fig 4). On average, the difference between the true  
314 fraction of cases caused by zoonotic spillover and the fraction inferred in a tree was 0.022  
315 (standard deviation 0.018), the difference for within-locality transmission was 0.006 (standard  
316 deviation 0.005), and the difference for between-locality transmission was 0.022 (standard  
317 deviation 0.018).

318

319 **Fig 4. Comparison of the true and inferred fraction of transmissions from each source type.**

320 For each of five parameter sets, 25 datasets were simulated and 200 transmission trees were  
321 sampled for each of these simulated datasets. **A.** Stacked bars show the true fraction of  
322 transmissions from zoonotic (bottom bar, medium-darkness), within-locality (middle bar, light  
323 color), and between-locality (top bar, darkest color). Points on the bars indicate the inferred  
324 values. If the fraction of transmissions for each source is perfectly inferred, points will lie exactly  
325 on the transition between bar colors. **B.** Box plots summarize the error in the inferred fraction of  
326 cases originating from each source type. The error size is small across all parameter sets,  
327 especially for within-locality human-to-human transmission. The upper whisker was calculated  
328 as  $\min(\max(x), Q_3+1.5*IQR)$  and the lower whisker was calculated as  $\max(\min(x), Q_1-1.5*IQR)$ .

329

330           The success at recovering individual transmission links was high overall but varied  
331 slightly depending on the true parameters underlying the simulation (S3 Fig). On average,  
332 sampled transmission trees inferred 85.9% of all sources correctly. Better performance was

333 observed for lower spillover rates and lower  $R$ , presumably due to the fewer opportunities for  
334 misattribution of cases. Some transmission links were more likely to be captured than others: on  
335 average 90.9% and 90.1% of sampled trees correctly inferred links with zoonotic and within-  
336 locality sources, respectively, but only 36.8% of trees correctly identified the source of between-  
337 locality transmission events.

### 338 **Epidemiological insights into monkeypox**

#### 339 **Applying the corrected-denominator method to 1980s monkeypox surveillance data.**

340 Between 1982 and 1986, the active monkeypox surveillance program in the Democratic  
341 Republic of the Congo detected 331 human cases in 171 localities [43]. For each human case, we  
342 know the name of the locality as well as the district or administrative subregion (henceforth  
343 referred to simply as ‘district’) and region to which it belongs. However, the total number of  
344 localities that would have been detected by surveillance had they experienced a case is unknown.  
345 We therefore used the corrected-denominator method to generate estimates under four different  
346 assumptions about which administrative unit most suitably represents the broader contact zone.  
347 The country-level, region-level, and district-level models correspond to progressively smaller  
348 choices of broader contact zones, while the locality-level model assumes that all instances of  
349 human-to-human transmission occur within a locality. We anticipate that assuming an  
350 excessively large broader contact zone could result in overestimating  $R$  and underestimating  $\lambda_z$  if  
351 too many spurious human-to-human transmission events are inferred from pairs of cases that just  
352 happen to occur within a generation-time interval of one another, while assuming an  
353 inappropriately small broader contact zone could result in the opposite parameter biases if the  
354 model is unable to detect actual incidents of human-to-human transmission because the cases  
355 occur in different (assumed) broader contact zones.



356 In the monkeypox analysis, the size of the administrative unit used as the broader contact  
357 zone has a strong effect on the resulting parameter estimates (Fig 5A). When larger  
358 administrative units are assumed to represent the broader contact zone, a given pair of cases is  
359 more likely to belong to the same broader contact zone, giving the model more opportunities to  
360 infer inter-locality human-to-human transmission events and resulting in larger estimated  
361 reproductive number  $R$  and a smaller spillover rate  $\lambda_z$ . Mean values of the posterior distribution  
362 of  $R$  range from 0.29 when transmission is assumed to occur only within localities to 0.52 when  
363 transmission is assumed to occur among all localities in the country (Table 1).

364

365 **Fig 5. Assumptions about the broader contact zone and the total number of localities under**  
366 **surveillance affect parameter estimates for the monkeypox dataset.** Estimates and 95% CIs  
367 for the reproductive number ( $R$ ) and the spillover rate ( $\lambda_z$ ) of the monkeypox dataset are shown  
368 for each of the four choices of spatial scale for the broader contact zone (locality = green, district  
369 = blue, region = purple, country = red). **A.** Inference performed using the corrected-denominator  
370 method that accounts for silent localities. Light background dots are draws from the posterior,  
371 larger dots designate the mean value, and bars indicate the 95% CI. **B.** Inference performed  
372 assuming that the fraction of localities under surveillance with one or more monkeypox cases ( $p$ )  
373 is 1/5, 1/2, or 1. For each assumption about the total number of localities, parameter estimates  
374 fall roughly along the line  $R = 1 - \frac{V*T*\lambda_z}{N}$  (indicated by grey lines), where  $V$  is the true number  
375 of localities under surveillance,  $T$  is the duration of surveillance, and  $N$  is to total number of  
376 cases. The position of estimates along this line depends on the spatial model used. Note that the  
377 slope of each line is proportional to  $-1/p$  because  $V = (\text{number of observed localities}) / p$ . Dots

378 represent the mean posterior estimates and bars indicate the 95% CI. The four darker dots show  
 379 the mean estimates from panel A.

380

381 **Table 1. District model performs best for the monkeypox dataset in DIC model**  
 382 **comparisons.**

| Approach for dealing with silent localities       | Model           | $\Delta$ DIC | mean $R$     | mean $\lambda_z$ | mean $\sigma$ |
|---------------------------------------------------|-----------------|--------------|--------------|------------------|---------------|
| Corrected-denominator method                      | Locality        | 23.11        | 0.290        | 0.000387         | 1             |
|                                                   | <b>District</b> | <b>0.0</b>   | <b>0.381</b> | <b>0.000309</b>  | <b>0.696</b>  |
|                                                   | Region          | 5.88         | 0.418        | 0.000271         | 0.622         |
|                                                   | Country         | 5.82         | 0.522        | 0.000188         | 0.464         |
| Assume all surveilled localities were observed    | Locality        | 21.98        | 0.272        | 0.000785         | 1             |
|                                                   | <b>District</b> | <b>0.0</b>   | <b>0.372</b> | <b>0.000676</b>  | <b>0.717</b>  |
|                                                   | Region          | 6.25         | 0.413        | 0.000633         | 0.656         |
|                                                   | Country         | 10.92        | 0.479        | 0.000564         | 0.568         |
| Assume 1/2 of surveilled localities were observed | Locality        | 17.06        | 0.290        | 0.000382         | 1             |
|                                                   | <b>District</b> | <b>0.0</b>   | <b>0.381</b> | <b>0.000334</b>  | <b>0.756</b>  |
|                                                   | Region          | 3.12         | 0.424        | 0.000311         | 0.684         |
|                                                   | Country         | 6.79         | 0.488        | 0.000276         | 0.598         |
| Assume 1/5 of surveilled localities were observed | Locality        | 15.05        | 0.310        | 0.000148         | 1             |
|                                                   | <b>District</b> | <b>0.0</b>   | <b>0.395</b> | <b>0.000130</b>  | <b>0.777</b>  |
|                                                   | Region          | 2.01         | 0.439        | 0.000121         | 0.704         |
|                                                   | Country         | 5.34         | 0.500        | 0.000108         | 0.622         |

383 Parameter inference for the monkeypox dataset was performed using four different approaches  
 384 for dealing with the silent locality problem: the corrected-denominator method (which conditions  
 385 on the observation process for localities under surveillance) and three assumptions about the  
 386 fraction of localities under surveillance that were observed. For each of these approaches,  
 387 inference was repeated using four choices for the broader contact zone and the DIC was  
 388 calculated. Parameter estimates and  $\Delta$ DIC values are shown. The model with lowest  $\Delta$ DIC is  
 389 preferred and is shown in bold text.

390

391           We used the mean parameter estimates obtained using each of the four broader contact  
392 zone assumptions to generate estimates of the expected total number of localities under  
393 surveillance. While only 171 localities were observed in the dataset, estimates of the total  
394 number of surveilled localities ranged from 337 (using the locality-level model) to 408 (using the  
395 country-level model). The district-level and region-level models generated similar estimates of  
396 351 and 366 total localities, respectively.

397 **Insights into how underlying assumptions drive monkeypox estimates.** We investigated how  
398 different assumptions about the true number of localities and the spatial scale of human-to-  
399 human transmission would affect the parameter estimates for the monkeypox system. To explore  
400 how the presence of silent localities affects results, we repeated the analysis using the basic  
401 method (which does not account for silent localities) under the assumption that the localities  
402 observed in the monkeypox dataset represent all, 1/2, and 1/5 of the total number of localities  
403 that were under surveillance. Furthermore, for each of these assumptions about the total number  
404 of localities under surveillance, we repeated the analysis using the four different choices of  
405 broader contact zone to determine how the assumed spatial scales of inter-locality transmission  
406 impacted inference results.

407           Both the choice of broader contact zone and the assumed total number of localities have a  
408 large impact on estimates of  $R$  and  $\lambda_z$  (Fig 5B). As noted above, models assuming smaller  
409 broader contact zones allow fewer opportunities for human-to-human transmissions to be  
410 inferred, and these models estimate substantially lower  $R$  values and correspondingly higher  
411 spillover rates. In contrast, assuming that a smaller fraction of surveilled localities were observed

412 leads to slightly higher estimates of  $R$  and substantially lower estimates of  $\lambda_z$  because the  
413 presence of many silent localities drives the estimate of the number of spillover events *per*  
414 *locality* per day lower. Estimates of  $R$  are most strongly affected by the choice of broader contact  
415 zone, while estimates of  $\lambda_z$  are most strongly impacted by assumed fraction of localities  
416 observed. For all assumptions of broader contact zone and total number of localities, the means  
417 of the parameters' posterior distributions fall along the line

$$418 \quad R = 1 - \frac{V * T * \lambda_z}{N} \quad , \quad (1)$$

419 where  $V$  is the true number of localities under surveillance,  $T$  is the number of days over which  
420 surveillance occurred, and  $N$  is to total number of cases in the monkeypox dataset. This  
421 relationship arises because the expected number of total cases is equal to the expected number of  
422 spillover events ( $V * T * \lambda_z$ ) multiplied by the total number of human cases expected to occur  
423 from each spillover event ( $1 / (1 - R)$  for  $0 < R < 1$ ). Each assumption about the total number of  
424 localities under surveillance corresponds to a separate line along which parameter estimates fall  
425 (Fig 5B). The position of the parameter estimates along this line depends on the spatio-temporal  
426 distribution of the  $N$  cases and the assumed spatial scale of human-to-human transmission.

427 **District-level broader contact zone preferred in model comparisons.** To assess which broader  
428 contact zone assumption is most appropriate for the monkeypox system, we used the deviance  
429 information criterion (DIC) to perform model comparisons for the corrected-denominator  
430 method as well as for each assumption about the number of surveilled localities. For the  
431 corrected-denominator method, the district-level model had the best DIC score, followed by the  
432 region and country-level models (Table 1). The locality-level model received a much larger DIC  
433 value, indicating that the data strongly support models that allow transmission between localities.

434 Similarly, for each of the three assumptions about the true number of surveilled localities, the  
435 district-scale model performed best in DIC model comparisons (Table 1).

436 **Inferring the sources and distances of transmission events.** We used the district-level  
437 corrected-denominator method to sample 20,000 transmission trees for the monkeypox dataset.  
438 The sampled transmission trees attributed an average of 60.8% (standard deviation of 2.2%) of  
439 cases to zoonotic spillover, 28.5% (standard deviation of 0.9%) of cases to within-locality  
440 human-to-human transmission, and 10.7% (standard deviation of 2.1%) of cases to between-  
441 locality human-to-human transmission. For comparison, the results using the three other broader  
442 contact zone assumptions are shown in S4A Fig. Each model's trees include a similar number of  
443 within-locality human-to-human transmission events, but increasing the spatial scale of the  
444 broader contact zone increases the number of inferred between-locality transmission events.

445 To characterize the distance range over which inter-locality transmission occurs, we  
446 focused on links in the sampled transmission trees that occurred between cases with known GPS  
447 coordinates (280 out of 331 monkeypox cases had recorded GPS coordinates). The number of  
448 transmission events in each sampled tree that occurred over a certain distance was then compared  
449 to the number of transmission events expected to occur over each distance if transmission  
450 between all localities in a broader contact zone was equally likely (see Methods 4.3 for how this  
451 'null distribution' was calculated).

452 For all models allowing inter-locality transmission, more transmission events were  
453 inferred to occur across  $\leq 30$  kilometers than expected based on the null distribution (Fig 6, S4B  
454 Fig). For each inferred transmission tree, a binomial test was used to examine whether more  
455 transmissions were inferred to occur over  $\leq 30$  kilometers than expected based on the null

456 distribution of transmission distances. Out of 20,000 sampled trees for each model, p-values of  
457 less than 0.1 were obtained in 93% of the district, 72% of the region, and 81% of the country-  
458 level models' trees. The median p-values for these three models were 0.007, 0.030, and 0.012,  
459 respectively (S5 Fig shows the full distributions of p-values obtained across all sampled trees).

460

461 **Fig 6. Distance of inferred inter-locality human-to-human transmission events.** Shaded bars  
462 show the difference between the mean proportion of inter-locality human-to-human  
463 transmissions inferred to occur over a given distance by the district model and the proportion  
464 expected based on the spatial distribution of localities (the 'null expectation'). Error bars show  
465 the standard deviation among all inferred transmission trees.

466

467 **Comparison of sampled transmission trees with contact-tracing data.** Contact-tracing, where  
468 the contacts of a case were recorded and follow-up investigations determined whether or not the  
469 contacts had become infected, was done for a subset of monkeypox cases. Instances where a  
470 contact developed an infection are presumed to be instances of human-to-human transmission.  
471 For each of these epidemiologically contact-traced links, we looked at how frequently the  
472 sampled transmission trees for each model captured the transmission link.

473 Of the 53 case pairs linked through contact tracing, an average of 79.5% (standard  
474 deviation of 4.2%) were recovered in each of the district model's sampled transmission trees (Fig  
475 7A). The highest success was seen for pairs of epidemiologically-linked cases whose dates of  
476 symptom onset were between 7 and 25 days apart (Fig 7B). Although it is generally believed that  
477 the generation interval for human-to-human transmission of monkeypox is between 7 and 23

478 days [43,53], several case pairs that occurred more than 23 days apart were epidemiologically  
479 linked through contact-tracing. It is possible that these links, which were often missed in the  
480 sampled transmission trees, are not true instances of human-to-human transmission. Cases that  
481 occurred in different localities were also less likely to be linked in a sampled transmission tree,  
482 though even for these inter-locality pairs, the district-level model tended to perform better than  
483 the other three models (S6 Fig). The four models had similar success at recovering within-  
484 locality links. In all models, when a link was incorrectly inferred, it frequently was inferred to  
485 originate from zoonotic spillover instead. Although the district model had the highest success at  
486 recovering contact-traced links, the sampled trees from all models recovered an average of >76%  
487 of contact pairs.

488

489 **Fig 7. Comparison of epidemiologically contact-traced links with sampled transmission**  
490 **trees. A. Circles** (left axis) show the fraction of sampled trees that infer the epidemiologically-  
491 traced source. Open circles represent inter-locality links while closed circles represent intra-  
492 locality links. **Crosses** (right axis) indicate the probability that a link is instead inferred to have a  
493 zoonotic source. Results are shown for the model assuming the district-level broader contact  
494 zone. Links are sorted from lowest to highest success. **B.** The fraction of sampled transmission  
495 trees that recover a contact-traced link is influenced by the number of days between the symptom  
496 onset of source and recipient cases. **Circles** (left axis) show how often a given link was inferred  
497 as a function of the generation interval while the **gray curve** (right axis) shows the probability  
498 density for the generation interval assumed by the model.

499

500 Comparison of the transmission tree generated using only contact-tracing data with the  
501 trees created using the district-level and locality-level models highlights how much our  
502 perception of the transmission dynamics depends on assumptions about spatial spread (Fig 8).  
503 Most of the within-locality transmission links detected through epidemiological contact-tracing  
504 appear in the locality-level model's tree, though the locality-level tree suggests substantially  
505 more human-to-human transmission events than captured in the contact-tracing tree. However,  
506 the locality-level tree misses all inter-locality links. The district-level model's tree captures most  
507 of the links indicated by the locality-level tree, and also suggests that inter-locality transmission  
508 is occurring, though it has low power to determine exactly which case pairs are linked through  
509 inter-locality transmission.

510

511 **Fig 8. Comparison of monkeypox transmission trees created from contact-tracing, the**  
512 **locality-level model, and the district-level model.** Points represent cases and edges indicate  
513 inferred transmission links between cases. Edge thickness corresponds to the frequency with  
514 which a given transmission link was inferred while edge color indicates whether a pair of linked  
515 cases occurred within the same (blue) or different (red) localities. The darkness of a point's fill  
516 indicates how frequently the case was inferred to have a zoonotic source, so transmission links  
517 often go from black points (cases caused by zoonotic spillover) to white points (cases infected by  
518 a human source).

519



## 520 **Sensitivity analyses**

521           We conducted a variety of sensitivity analysis tests using simulated datasets to assess  
522 how robust the method was over a range of parameter values and assumption violations (full  
523 descriptions are provided in S1 Text). The method continued to perform well even at very high  
524 spillover rates (S7 Fig, S2 Table) and when the offspring distribution used in simulations  
525 differed from the one assumed in the inference (S8 Fig, S3 Table). In some situations, assuming  
526 a larger broader contact zone than the one used for simulations could lead to an overestimation of  
527  $R$  and an underestimation of  $\lambda_z$  (S4 and S5 Tables). This outcome is consistent with what was  
528 observed in the monkeypox analysis where assuming a larger spatial scale for the broader contact  
529 zone corresponded to a higher estimate of  $R$  and a smaller estimate of the spillover rate (Fig 5).  
530 When simulations were run with highly structured, non-homogeneous spillover, substantial  
531 biases in the inference results occurred because this spillover process gives rise to clusters of  
532 primary cases that the model mistakes as arising from human-to-human transmission (S9 Fig).

## 533 **Discussion**

### 534 **Principal findings**

535           In this work, we developed and tested a method to infer fundamental epidemiological  
536 parameters and transmission patterns for zoonotic pathogens from epidemiological surveillance  
537 data with aggregated spatial information. When tested against simulated datasets, the method  
538 successfully recovered estimates of  $R$  and spillover rate close to the true values and also inferred  
539 the fraction of cases resulting from zoonotic, within-locality, and between-locality sources with a  
540 high degree of accuracy. The ‘unknown denominator problem’ that occurs when the total number

541 of localities under surveillance is unknown can cause large biases in parameter estimates, so we  
542 modified the inference method to account for this observational process and enable unbiased  
543 estimation in the presence of this common data gap.

544 We applied the method to a rich surveillance dataset of human monkeypox in the Congo  
545 basin from the 1980s and found that human-to-human transmission of monkeypox between  
546 localities plays an important role in the pathogen's spread. Of the four assumptions we tested for  
547 the spatial scale of the broader contact zone, the district-level model was best supported by DIC  
548 model comparisons and validation with contact-tracing. In addition, the signal of elevated inter-  
549 locality transmission occurring over  $\leq 30$  kilometers suggests that most inter-locality  
550 transmissions occur in a relatively small neighborhood, consistent with the limited transportation  
551 infrastructure in the DRC. This further corroborates that the district-level model, which is the  
552 smallest spatial aggregation scale that still permits inter-locality transmission, is likely the most  
553 appropriate choice for capturing inter-locality transmission patterns of human monkeypox.

554 The district-level model estimates a reproductive number for human monkeypox of 0.38  
555 (0.31-0.45 95% CI). This value is slightly higher than previous estimates of  $R$  for the 1980s DRC  
556 monkeypox dataset, which was estimated as 0.30 (90% CI 0.22-0.40) in Blumberg and Lloyd-  
557 Smith [16], as 0.32 (90% CI 0.22-0.40) in Lloyd-Smith et al. [54], and as 0.28 in Jezek et al.  
558 [52]. There are several explanations for the higher estimate we obtained. The previous studies  
559 may have underestimated the reproductive number, particularly if contact-tracing or cluster  
560 formation methods were liable to miss transmissions that occurred between localities. Indeed, the  
561 estimate obtained using the locality-level model ( $R = 0.29$ ) closely matches previous estimates. It  
562 is also possible that the district-level model may overestimate the amount of human-to-human  
563 transmission in the same way that the region- and country-level models picked up a higher signal

564 of human-to-human transmission than the district-level model due to their larger broader contact  
565 zone sizes. The size of the DRC's districts and administrative subregions used for the district-  
566 level model vary in size, but average around fifteen thousand square kilometers, or around one  
567 hundred forty kilometers across, encompassing a much greater distance than most human-to-  
568 human transmission events likely occur over. We therefore expect that the true value of  $R$  is  
569 bounded by the estimates of the locality-level and the district-level models.

570 In addition to providing an estimate of monkeypox's reproductive number, the methods  
571 give insight into the frequency of spillover and the spatial scale of human-to-human  
572 transmission. The district-level model estimates a mean spillover rate of around 0.11 spillover  
573 events per locality per year, which corresponds to roughly one spillover event every nine years in  
574 each locality. It also estimated that around 70% of human-to-human transmissions occur within a  
575 locality. This finding contrasts with the assumption that human-to-human transmission occurs  
576 within a locality, which is commonly used to generate transmission clusters, and suggests that  
577 estimates generated using that assumption may substantially underestimate the amount of  
578 human-to-human transmission occurring in the system. The importance of inter-locality contacts  
579 has been reported for the neighboring country of Uganda, where a survey by le Polain de  
580 Waroux et al. [55] on rural movement and social contact patterns indicated that 12% of social  
581 contacts occurred outside participants' village of residence.

582 Among human monkeypox cases with recorded geographical coordinates, a clear signal  
583 emerged of higher rates of human-to-human transmission between localities  $\leq 30$  kilometers  
584 apart. This pattern seems reasonable given the infrastructure and general difficulty of  
585 transportation in the more remote regions of the DRC. It also suggests a similar pattern of

586 movement as found in the le Polain de Waroux et al. [55] survey. Their analyses indicate that  
587 90% of people who traveled outside their village of residence remained within 12 km.

### 588 **Spatial scale of transmission and aggregated spatial data**

589         The potential biases introduced when analyzing data reported at a coarse spatial scale  
590 have been explored in a wide range of contexts [56–58], yet the implications of using this type of  
591 spatial information to infer the transmission dynamics of an infectious disease is not obvious.  
592 When spatial information is only reported at the level of large spatial zones like districts, regions,  
593 or countries, no finer-scale information is available to inform which human cases transmitted  
594 infection to one another between different localities. Here we explored how the size of these  
595 spatial zones would affect inference for the monkeypox system by repeating the analysis using  
596 spatial information at the district, region, or country resolution. The large differences in  
597 parameter estimates generated under different broader contact zone assumptions in the  
598 monkeypox analysis illustrates how sensitive inference results can be to the spatial scale  
599 assumed for human-to-human transmission, and suggests that reporting spatial data at too large a  
600 scale or ignoring inter-locality transmissions can lead to substantial estimate biases.

601         In the context of monkeypox in the DRC, analysis of simulations using the exact  
602 geographic coordinates reported for 80% of localities in the monkeypox surveillance dataset  
603 replicated the increasing estimates of  $R$  and decreasing estimates of spillover rate as the spatial  
604 aggregation scale increased (S4 and S5 Tables). However, the magnitude of the effect in  
605 simulated datasets was smaller than in the monkeypox analysis. This could be a result of the  
606 particular assumptions about inter-locality transmission patterns used in the simulations, but it  
607 also opens the question of whether outside large-scale factors such as seasonality or fluctuations

608 in surveillance effort might induce temporal autocorrelation among unlinked human cases,  
609 giving rise to temporal clustering of cases that the model interprets as human-to-human  
610 transmission.

611 This analysis serves to emphasize the importance of selecting an appropriate spatial scale  
612 and using caution when interpreting results obtained using spatially aggregated data. Many  
613 methods implicitly assume a certain scale of spatial transmission, often ignoring the possibility  
614 of longer-range transmissions, so careful consideration of whether that scale is appropriate for  
615 the system is essential.

616 In general, recording precise spatial locations of cases is vital for increasing the  
617 inferential power of modeling analyses. Developing methods that maintain spatial information  
618 without risking a breach in confidentiality is a nontrivial challenge, but progress has already been  
619 made in generating possible solutions such as geographic masking or the verified neighbor  
620 approach [59,60].

## 621 **Model assumptions and future directions**

622 In this work, we assumed that the spillover rate was homogenous through time and space,  
623 but more complex disease dynamics in the reservoir or spatiotemporal heterogeneity in animal-  
624 human contacts may cause nontrivial deviations from this assumption in real-world systems. Of  
625 particular concern is the possibility that outbreaks in the reservoir could cause periods of  
626 amplified local spillover, which could create a clustering pattern of human cases potentially  
627 indistinguishable from human-to-human transmission. Without information about disease  
628 dynamics in the reservoir, accounting for this heterogeneous spillover will be challenging, but

629 certain types of pathogen dynamics, such as seasonal epidemics or expanding wave-fronts of  
630 infection, could be incorporated into the model structure.

631 Similarly, spatially and temporally variable surveillance intensity could potentially mimic  
632 the signal of human-to-human transmission clusters and result in overestimates of the  
633 reproductive number. Future surveillance programs could help mitigate this challenge by  
634 recording a measure of surveillance effort undertaken at each location and time.

635 This work assumes that  $R$  is constant across all localities; however, to obtain a full picture  
636 of pathogen emergence risk, it may be necessary to consider the heterogeneity in transmission  
637 intensity among different human populations, as well as the interplay between where  $R$  is highest  
638 versus where spillover tends to occur [61]. In some zoonotic systems, for instance, spillover  
639 predominantly occurs into remote villages and towns that are in close proximity to forested  
640 regions. However, we generally expect these villages to have lower levels of human-to-human  
641 transmission than the more densely-packed cities [62–64]. A pathogen may even be incapable of  
642 supercritical spread until it reaches such a city. Therefore, to assess the probability a pathogen  
643 will successfully emerge and to determine which populations to target with control measures, it  
644 may be necessary to establish not only the spillover rate and  $R$  across different populations, but  
645 also the rate of dispersal of the pathogen between those populations [61].

646 Several assumptions may need to be modified when applying this method to other  
647 zoonotic systems. Because we assume that the source of human-to-human transmission events  
648 will show symptoms before the recipient, the likelihood function can treat human cases as  
649 occurring independently conditional on preceding cases. For zoonotic diseases in which infected  
650 individuals frequently transmit the pathogen before showing symptoms (or when asymptomatic

651 cases contribute non-negligibly to transmission), the likelihood expression would need to be  
652 modified substantially, and the lack of independence between cases might make a simulation-  
653 based inference approach necessary.

654 We assume that sufficiently few infections occur relative to the population size that  
655 depletion of susceptible individuals does not affect transmission dynamics. While appropriate  
656 when there are few human infections or in the early stages of invasion, this assumption could  
657 bias estimates if applied in a system with sufficiently high levels of human infection or where  
658 transmission occurs primarily among highly clustered contacts, such as individuals within a  
659 household. We also note that in the monkeypox example we are estimating the *effective*  
660 reproductive number, which takes into account existing population immunity. If the goal instead  
661 were to establish the basic reproductive number (the reproductive number for the pathogen in a  
662 fully susceptible human population), accounting for past exposure to the pathogen or other cross-  
663 immunizing pathogens or vaccines would be necessary.

664 The current methods assume that all human cases that occur during the surveillance  
665 period inside the surveillance area are observed. This assumption is plausible for the analysis of  
666 the 1980s monkeypox dataset, given the unusually high resources and experience level of this  
667 surveillance effort in the aftermath of the smallpox eradication program and the use of serology  
668 to detect missed cases retrospectively [43]. However, most zoonotic surveillance systems operate  
669 with limited resources and have a much lower detection rate. Ignoring unobserved cases will lead  
670 to underestimation of the spillover rate, while the effect on estimation of  $R$  will depend on the  
671 nature of the surveillance program. For instance, in the chain-size analyses of Ferguson et al.  
672 [28] and Blumberg and Lloyd-Smith [16],  $R$  is underestimated when the detection probability of  
673 each case is independent of one another or when right-censoring occurs but overestimated when

674 a detected case triggers a retrospective investigation that detects all cases in that transmission  
675 chain.

## 676 **Conclusions**

677 This work expands our ability to assess and quantify important zoonotic pathogen traits  
678 from commonly available epidemiological surveillance data, even in the absence of exact spatial  
679 information or a complete count of localities under surveillance. We anticipate that these  
680 methods will have greatest value in the common circumstance when the source of cases,  
681 particularly whether a case came from an animal or human source, cannot be readily established.  
682 In such situations, the ability to infer the pathogen's reproductive number, spillover rate, and  
683 spatial spread patterns from available surveillance data, will greatly enhance our understanding  
684 of the pathogen's behavior and could provide valuable insights to help guide surveillance design  
685 and outbreak response.

## 686 **Methods**

### 687 **Model**

688 In broad terms, the model describes the probability of observing a set of symptom onset  
689 times and locations of human cases given the timing and location of previous cases and  
690 parameters that underlie the transmission process. Human infections can arise from either  
691 animal-to-human transmission ('zoonotic spillover') or human-to-human transmission (Fig 1B).  
692 Human-to-human contact occurs more frequently within a locality than between localities, but  
693 can still occur between localities that belong to the same broader contact zone (Fig 1A).



694 All sources of infection are assumed to generate new cases independently of one another.  
695 The number of human cases that become symptomatic on each day in each locality caused by  
696 zoonotic spillover is assumed to follow a Poisson distribution with mean  $\lambda_z$ . For simplicity and  
697 because reservoir disease dynamics are rarely well characterized, we assume the Poisson process  
698 is homogenous through time and across localities, but this assumption could be modified for a  
699 system where more information is available about the reservoir dynamics (e.g., [34]). New  
700 infections can also arise from contact with infected humans. The number of new infections that  
701 become symptomatic on day  $t$  in locality  $v$  caused by an infectious individual who became  
702 symptomatic on day  $s$  in locality  $w$  is assumed to be a Poisson-distributed random variable with  
703 mean  $\lambda_{\{s,w\},\{t,v\}}$ .

704 Aggregating cases caused by all sources of infection (both human and zoonotic), the total  
705 number of new cases on day  $t$  in locality  $v$  is a Poisson-distributed random variable with mean

$$706 \quad \mu_{t,v} = \sum_{s=1}^{t-1} \sum_{w=1}^{\mathcal{V}} [N_{s,w} * \lambda_{\{s,w\},\{t,v\}}] + \lambda_z \quad , \quad (2)$$

707 where  $\mathcal{V}$  is the number of localities under surveillance and  $N_{s,w}$  is the number of cases with  
708 symptom onset on day  $s$  in locality  $w$ .

709 The mean of the Poisson random variable describing human-to-human transmission,  
710  $\lambda_{\{s,w\},\{t,v\}}$ , depends on the reproductive number of the pathogen in humans, the generation time  
711 distribution, and the coupling between localities:

$$712 \quad \lambda_{\{s,w\},\{t,v\}} = R * g(t-s) * H(v,w) \quad , \quad (3)$$

713 where  $R$  is the reproductive number of the pathogen;  $g(t-s)$  is the generation time distribution,  
714 which gives the probability that a secondary case becomes symptomatic  $t-s$  days after the index

715 case shows symptoms; and  $H(v,w)$  describes the amount of transmission between localities  $v$  and  
716  $w$  and takes values between zero (if no transmission can occur between localities  $v$  and  $w$ ) and  
717 one (if all cases arising from an infected individual in locality  $v$  arise in locality  $w$ ). The  
718 generation time  $g(t-s)$  is assumed to follow a negative binomial distribution. For this study, we  
719 used a mean of 16 days and a dispersion parameter of 728.7 (calculated by fitting a negative  
720 binomial distribution to observed generation interval counts for smallpox presented in Fig. 2b of  
721 [65]), which is consistent with previous estimates of the generation time for both smallpox and  
722 monkeypox [43,53,65,66].

723         The factor that describes the amount of transmission that occurs between localities  $v$  and  
724  $w$  ( $H(v,w)$ ) could reflect Euclidean distance, travel time, inclusion in different spatial zones, or  
725 any other available measurement. To accommodate the imperfect spatial information available  
726 for many zoonotic surveillance systems, this study focused on developing methods for the  
727 situation when only a locality name and an aggregated spatial zone (such as district or country) is  
728 reported for cases, rather than an exact position. We assume that inter-locality transmission  
729 occurs only among localities within the same broader contact zone (Fig 1A). Because  
730 transmission will be greater within a locality than between localities, a proportion  $\sigma$  of secondary  
731 cases are assumed to occur in the same locality as the source case and a proportion  $(1-\sigma)$  of  
732 secondary cases are assumed to occur amongst the outside localities that are within the same  
733 broader contact zone as the source case. This outside transmission is assumed to be divided  
734 equally among all localities within the index case's broader contact zone:

$$735 \quad H(v,w) = \begin{cases} 0, & Z_v \neq Z_w \\ \sigma, & v = w \\ \frac{(1-\sigma)}{(V_v-1)}, & Z_v = Z_w, v \neq w \end{cases}, \quad (4)$$

736 where  $Z_v$  indicates the broader contact zone of locality  $v$  and  $\mathcal{V}_v$  is the total number of localities  
737 in the broader contact zone of locality  $v$ . For a given locality  $v$ , the sum of  $H(v,w)$  across all  $w$   
738 equals one. To observe the effect of assuming different broader contact zones, the monkeypox  
739 case study was repeated under four different assumptions about the spatial scale of human-to-  
740 human transmission: locality, district, region, and country-level.

## 741 **Model inference**

742 **Likelihood function.** Using the model described above, a likelihood function was used to  
743 evaluate a parameter set ( $\theta = \{R, \lambda_v, \sigma\}$ ) given the data ( $D = N_{t,v}$  cases observed on each day  $t$  and  
744 locality  $v$ ):

$$745 \quad \mathcal{L}(\theta|D) = \prod_{t=1}^T \prod_{v=1}^V \frac{e^{\mu_{t,v}} \mu_{t,v}^{N_{t,v}}}{N_{t,v}!}, \quad (5)$$

746 where  $T$  is the number of days surveillance was conducted and  $V$  is the total number of localities  
747 under surveillance.

748 While this approach works well when the total number of surveilled localities is known  
749 (see Fig 3A), localities often only appear in the dataset if they have reported cases; as a result we  
750 may not know the total number of localities under surveillance. Ignoring localities with zero  
751 cases can lead to biased parameter estimates (see Fig 3B). We explored several alternative  
752 approaches to account for these silent localities; the preferred approach rescales the likelihood  
753 function to reflect that localities with zero cases are not included in the data. Several  
754 approximations are made in this approach to estimate unknown parameters and improve  
755 computational tractability. The details of the derivation for the model are given in S1 Text, and  
756 the final likelihood function is:

$$757 \quad \mathcal{L}(\theta|D) = \prod_{w=1}^W \frac{\prod_{t=1}^T \frac{e^{\mu_{t,w}} \mu_{t,w}^{N_{t,w}}}{N_{t,w}!}}{\left(1 - e^{-\lambda_z T - \left(\frac{R T \lambda_z (1-\sigma)(E[V]-1)}{E[V]-1 - R(E[V]-2+\sigma)}\right)}\right)}, \quad (6)$$

758 where  $W$  is the number of observed localities (localities with one or more cases) and  $E[V]$  is the  
759 expected number of localities given the parameter values and the number of observed localities.

760 **Parameter estimation.** Markov chain Monte Carlo (MCMC) was used to obtain the posterior  
761 distributions of the model parameters. The fraction of transmissions occurring within a locality  
762 ( $\sigma$ ) and the reproductive number ( $R$ ) were given uniform priors on zero to one. The expected  
763 number of spillover events per locality per day ( $\lambda_z$ ) was given a uniform prior with a lower bound  
764 of zero and an upper bound selected to be far above the converged posterior distribution (ranging  
765 from 0.0075 to 1, see S10 Fig for comparison of spillover priors and posterior distributions).

766 The chains were run for 100,000 steps, with a burn-in of 20,000. They satisfied visual  
767 inspection for convergence. In addition, the Gelman and Rubin multiple sequence diagnostic was  
768 evaluated for three parallel chains from each of the models for the monkeypox dataset [67]. The  
769 Gelman-Rubin potential scale reduction values were less than 1.00033 across all models,  
770 indicating that the chains have converged close to the target distribution [68].

## 771 **DIC model comparisons**

772 For the monkeypox dataset, four assumptions about the choice of broader contact zone  
773 were compared using the deviance information criterion (DIC). This approach combines a  
774 complexity measure, used to capture the effective number of parameters in each model, with a  
775 measure of fit in order to perform model comparisons. Models are rewarded for better  
776 ‘goodness-of-fit’ to the data and penalized for increasing model complexity. Similarly to the

777 well-known Akaike information criterion (AIC) model comparisons, models with smaller DIC  
778 values are preferred. As a rule of thumb, a difference between models' scores of four or more  
779 generally indicates that the model with the larger value is 'considerably less' well supported by  
780 the empirical evidence [69]. The values necessary to calculate the DIC can be readily obtained  
781 from the MCMC output [70].

## 782 **Transmission tree reconstruction**

783         The origin of cases (zoonotic spillover, intra-locality human-to-human transmission, or  
784 inter-locality human-to-human transmission) and the distances of inter-locality human-to-human  
785 transmission events (when case localities are known) can be established given a particular  
786 transmission tree. To gain estimates of these measures, trees were sampled based on the model  
787 and the parameter posterior distributions. From the MCMC output (representing draws from the  
788 posterior distribution),  $d_1$  sets of parameter estimates were drawn to create  $d_1$  transmission-  
789 probability matrices ( $\mathbf{P}$ ). The entry  $P_{ij}$  describes the probability that individual  $i$  was infected by  
790 individual  $j$ . The diagonal values of the matrix represent the probability a case originated from  
791 zoonotic spillover. For a case  $i$  observed to occur on day  $t$  in locality  $v$ , the probability that case  $j$   
792 was the source of case  $i$  ( $P_{ij}$ ) was taken to be the proportion of  $\mu_{t,v}$  (the expected total number of  
793 cases on that day and locality; defined in equation 2) contributed by case  $j$ . By sampling  $d_2$   
794 transmission trees from each of these transmission-probability matrices, we calculated the  
795 proportion of cases that resulted from spillover, within-locality transmission, and between-  
796 locality transmission in each sampled tree. When testing the method using 125 simulated  
797 datasets, 200 sampled transmission trees were generated for each dataset, with  $d_1 = 20$  and  $d_2$   
798  $= 10$ . For the monkeypox dataset, 20,000 transmission trees were generated with  $d_1 = 200$  and  $d_2$   
799  $= 100$ .

800 For inferred inter-locality human-to-human transmission events in the monkeypox  
801 dataset, if the GPS coordinates were known for both localities in a transmission pair, the  
802 transmission distance was calculated using the *gdist* function in the R package *Imap* [71]. The  
803 ‘null distribution,’ used for comparing the number of inferred inter-locality transmission events  
804 with the number expected to occur if spatial location played no role in transmission, was  
805 calculated by pooling all cases for which locality GPS coordinates are known, sampling all inter-  
806 locality pairs permitted by the model, and recording the distance between the localities in each  
807 pair.

### 808 **Simulation of test datasets**

809 To test the effectiveness of the methods, datasets with known parameter values were  
810 simulated using the model explained above. Simulations were run over 1825 days  
811 (approximately 5 years) and 325 surveilled localities. The localities were assumed to be  
812 partitioned across thirty districts and six regions, with the distribution of localities across districts  
813 and regions similar to that observed for the monkeypox dataset. The generation time interval (the  
814 number of days between symptom onset of the source and recipient cases) was assumed to  
815 follow a negative binomial distribution with a mean of 16 days and a dispersion parameter of  
816 728.7 (as described above), with a maximum generation time interval of 40 days. A number of  
817 parameter sets, as well as different underlying model structures, were used for simulations (S6  
818 Table). Simulation parameters were chosen to approximate the monkeypox dataset, with  $\sigma$  set at  
819 0.75,  $R$  ranging from 0.2 to 0.6, and  $\lambda_z$  ranging from 0.0001 to 0.1. Unless otherwise specified,  
820 simulations were performed assuming the district-level model. Details on the models used for  
821 sensitivity analyses that use the exact spatial location of cases or allow highly structured and  
822 non-homogenous spillover patterns are provided in S1 Text.

## 823 **Monkeypox data**

824 Data on human monkeypox cases in the Democratic Republic of the Congo (DRC),  
825 formerly ‘Zaire,’ were collected as part of an intensive surveillance program supported by the  
826 World Health Organization. During the peak surveillance period, between 1982 and 1986 [72],  
827 data on 331 cases of laboratory-confirmed human monkeypox were recorded (see Fig 2, S1  
828 Data) [43]. As part of field investigations, mobile teams visited the locality of a monkeypox case  
829 to collect information about the case, such as the date of fever and rash onset (for this study, the  
830 symptom onset date was taken to be the fever onset date; if the date of onset was not recorded,  
831 the rash onset date was used instead), as well as to identify individuals who had had close contact  
832 with the case [52,73]. If one of these contacts developed monkeypox within 7 to 21 days of first  
833 exposure, the presumptive source case was recorded (S2 Data) [43,73].

834 Between 1982 and 1986, human monkeypox cases were observed in 171 distinct  
835 localities, distributed among 30 districts and administrative subregions (simply referred to as  
836 ‘districts’) and 6 regions. The total number of localities that could have been detected by  
837 surveillance is unknown. Of the 171 observed localities, GPS coordinates are available for 136  
838 localities (which corresponds to 280 out of 331 cases). The district, region, and country of a  
839 locality were always recorded.

840

## 841 **References**

- 842 1. Morse SS. Factors in the Emergence of Infectious Diseases. *Emerg Infect Dis J* [Internet].  
843 1995;1(1):7. Available from: <http://wwwnc.cdc.gov/eid/article/1/1/95-0102>
- 844 2. Woolhouse MEJ, Gowtage-Sequeria S. Host Range and Emerging and Reemerging  
845 Pathogens. *Emerg Infect Dis* [Internet]. 2005 Dec;11(12):1842–7. Available from:  
846 <http://www.ncbi.nlm.nih.gov/pmc/articles/PMC3367654/>
- 847 3. Xu R-H, He J-F, Evans MR, Peng G-W, Field HE, Yu D-W, et al. Epidemiologic Clues to  
848 SARS Origin in China. *Emerg Infect Dis* [Internet]. 2004 Jun;10(6):1030–7. Available  
849 from: <http://www.ncbi.nlm.nih.gov/pmc/articles/PMC3323155/>
- 850 4. Jones KE, Patel NG, Levy MA, Storeygard A, Balk D, Gittleman JL, et al. Global trends  
851 in emerging infectious diseases. *Nature* [Internet]. 2008 Feb 21;451(7181):990–3.  
852 Available from: <http://www.ncbi.nlm.nih.gov/pmc/articles/PMC5960580/>
- 853 5. Lloyd-Smith JO, George D, Pepin KM, Pitzer VE, Pulliam JRC, Dobson AP, et al.  
854 Epidemic dynamics at the human-animal interface. *Science* [Internet]. 2009 Dec  
855 4;326(5958):1362–7. Available from:  
856 <http://www.ncbi.nlm.nih.gov/pmc/articles/PMC3891603/>
- 857 6. Gire SK, Goba A, Andersen KG, Sealfon RSG, Park DJ, Kanneh L, et al. Genomic  
858 surveillance elucidates Ebola virus origin and transmission during the 2014 outbreak.  
859 *Science* (80- ) [Internet]. 2014 Sep 11;345(6202):1369–72. Available from:  
860 <http://science.sciencemag.org/content/345/6202/1369.abstract>
- 861 7. Olival KJ, Hosseini PR, Zambrana-Torrel C, Ross N, Bogich TL, Daszak P. Host and  
862 viral traits predict zoonotic spillover from mammals. *Nature* [Internet]. 2017 Jun



- 863 29;546(7660):646–50. Available from: <http://dx.doi.org/10.1038/nature22975>
- 864 8. Memish ZA, Cotten M, Meyer B, Watson SJ, Alshafiqi AJ, Al Rabeeah AA, et al. Human  
865 Infection with MERS Coronavirus after Exposure to Infected Camels, Saudi Arabia, 2013.  
866 *Emerg Infect Dis* [Internet]. 2014 Jun;20(6):1012–5. Available from:  
867 <http://www.ncbi.nlm.nih.gov/pmc/articles/PMC4036761/>
- 868 9. Woolhouse M, Gaunt E. Ecological Origins of Novel Human Pathogens. *Crit Rev*  
869 *Microbiol* [Internet]. 2007 Jan 1;33(4):231–42. Available from:  
870 <https://doi.org/10.1080/10408410701647560>
- 871 10. National Research Council (US) Committee on Achieving Sustainable Global Capacity  
872 for Surveillance and Response to Emerging Diseases of Zoonotic Origin; Keusch GT,  
873 Pappaioanou M, Gonzalez MC, et al. editors. *Sustaining Global Surveillance and*  
874 *Response to Emerging Zoonotic Diseases*. Washington Natl Acad Press [Internet]. 2009;  
875 Available from: <https://www.ncbi.nlm.nih.gov/books/NBK215317/>
- 876 11. Heesterbeek H, Anderson R, Andreasen V, Bansal S, De Angelis D, Dye C, et al.  
877 Modeling infectious disease dynamics in the complex landscape of global health. *Science*  
878 [Internet]. 2015 Mar 13;347(6227):aaa4339-aaa4339. Available from:  
879 <http://www.ncbi.nlm.nih.gov/pmc/articles/PMC4445966/>
- 880 12. Lloyd-Smith JO, Funk S, McLean AR, Riley S, Wood JLN. Nine challenges in modelling  
881 the emergence of novel pathogens. *Epidemics* [Internet]. 2015;10:35–9. Available from:  
882 <http://www.sciencedirect.com/science/article/pii/S1755436514000504>
- 883 13. Plowright RK, Parrish CR, McCallum H, Hudson PJ, Ko AI, Graham AL, et al. Pathways  
884 to zoonotic spillover. *Nat Rev Microbiol*. 2017;15(8):502–10.

- 885 14. Anderson RM, May RM. Infectious diseases of humans : dynamics and control. Oxford.  
886 New York: Oxford University Press; 1991.
- 887 15. Keeling MJ, Rohani P. Modeling Infectious Diseases in Humans and Animals. Princeton  
888 Univ. Press; 2008. 366 p.
- 889 16. Blumberg S, Lloyd-Smith JO. Inference of  $R_0$  and Transmission  
890 Heterogeneity from the Size Distribution of Stuttering Chains. PLoS Comput Biol  
891 [Internet]. 2013;9(5):e1002993. Available from:  
892 <http://dx.doi.org/10.1371/journal.pcbi.1002993>
- 893 17. Kravitz HM. Denominator Difficulties. Wiley StatsRef Stat Ref Online. 2014;
- 894 18. Tatem AJ. Mapping the denominator: spatial demography in the measurement of progress.  
895 Int Health [Internet]. 2014 Sep 14;6(3):153–5. Available from:  
896 <http://www.ncbi.nlm.nih.gov/pmc/articles/PMC4161992/>
- 897 19. Ozonoff A, Jeffery C, Manjourides J, White LF, Pagano M. Effect of spatial resolution on  
898 cluster detection: a simulation study. Int J Health Geogr [Internet]. 2007;6(1):52.  
899 Available from: <https://doi.org/10.1186/1476-072X-6-52>
- 900 20. Zhang Z, Manjourides J, Cohen T, Hu Y, Jiang Q. Spatial measurement errors in the field  
901 of spatial epidemiology. Int J Health Geogr [Internet]. 2016;15(1):21. Available from:  
902 <https://doi.org/10.1186/s12942-016-0049-5>
- 903 21. Dudas G, Carvalho LM, Bedford T, Tatem AJ, Baele G, Faria NR, et al. Virus genomes  
904 reveal factors that spread and sustained the Ebola epidemic. Nature [Internet]. 2017 Apr  
905 20;544(7650):309–15. Available from:  
906 <http://www.ncbi.nlm.nih.gov/pmc/articles/PMC5712493/>

- 907 22. Curtis AJ, Mills JW, Leitner M. Spatial confidentiality and GIS: re-engineering mortality  
908 locations from published maps about Hurricane Katrina. *Int J Health Geogr* [Internet].  
909 2006;5(1):44. Available from: <https://doi.org/10.1186/1476-072X-5-44>
- 910 23. National Research C. Putting People on the Map: Protecting Confidentiality with Linked  
911 Social-Spatial Data. Stern PC, Gutman MP, editors. Washington, DC: National  
912 Academies Press; 2007.
- 913 24. Gutmann M, Witkowski K, Colyer C, O'Rourke JM, McNally J. Providing Spatial Data  
914 for Secondary Analysis: Issues and Current Practices relating to Confidentiality. *Popul*  
915 *Res Policy Rev* [Internet]. 2008;27(6):639–65. Available from:  
916 <http://www.ncbi.nlm.nih.gov/pmc/articles/PMC2600804/>
- 917 25. de Montjoye Y-A, Hidalgo CA, Verleysen M, Blondel VD. Unique in the Crowd: The  
918 privacy bounds of human mobility. 2013 Mar 25;3:1376. Available from:  
919 <http://dx.doi.org/10.1038/srep01376>
- 920 26. De Serres G, Gay NJ, Farrington CP. Epidemiology of Transmissible Diseases after  
921 Elimination. *Am J Epidemiol* [Internet]. 2000 Jun 1;151(11):1039–48. Available from:  
922 <http://dx.doi.org/10.1093/oxfordjournals.aje.a010145>
- 923 27. Jansen VAA, Stollenwerk N, Jensen HJ, Ramsay ME, Edmunds WJ, Rhodes CJ. Measles  
924 Outbreaks in a Population with Declining Vaccine Uptake. *Science* (80- ) [Internet]. 2003  
925 Aug 7;301(5634):804 LP-804. Available from:  
926 <http://science.sciencemag.org/content/301/5634/804.abstract>
- 927 28. Ferguson NM, Fraser C, Donnelly CA, Ghani AC, Anderson RM. Public Health Risk  
928 from the Avian H5N1 Influenza Epidemic. *Science* (80- ) [Internet]. 2004;304(5673):968–

- 929 9. Available from: <http://www.sciencemag.org/content/304/5673/968.short>
- 930 29. Cauchemez S, Epperson S, Biggerstaff M, Swerdlow D, Finelli L, Ferguson NM. Using  
931 Routine Surveillance Data to Estimate the Epidemic Potential of Emerging Zoonoses:  
932 Application to the Emergence of US Swine Origin Influenza A H3N2v Virus. *PLoS Med*  
933 [Internet]. 2013 Mar 5;10(3):e1001399. Available from:  
934 <http://dx.doi.org/10.1371/journal.pmed.1001399>
- 935 30. Blumberg S, Lloyd-Smith JO. Comparing methods for estimating  $R(0)$  from the size  
936 distribution of subcritical transmission chains. *Epidemics* [Internet]. 2013 Sep  
937 3;5(3):10.1016/j.epidem.2013.05.002. Available from:  
938 <http://www.ncbi.nlm.nih.gov/pmc/articles/PMC3821076/>
- 939 31. Wallinga J, Teunis P. Different Epidemic Curves for Severe Acute Respiratory Syndrome  
940 Reveal Similar Impacts of Control Measures. *Am J Epidemiol* [Internet]. 2004 Sep  
941 15;160(6):509–16. Available from:  
942 <http://aje.oxfordjournals.org/content/160/6/509.abstract>
- 943 32. Lo Iacono G, Cunningham AA, Fichet-Calvet E, Garry RF, Grant DS, Khan SH, et al.  
944 Using Modelling to Disentangle the Relative Contributions of Zoonotic and  
945 Anthroponotic Transmission: The Case of Lassa Fever. *PLoS Negl Trop Dis* [Internet].  
946 2015 Jan 8;9(1):e3398. Available from:  
947 <http://dx.doi.org/10.1371/journal.pntd.0003398>
- 948 33. White LF, Pagano M. A likelihood-based method for real-time estimation of the serial  
949 interval and reproductive number of an epidemic. *Stat Med* [Internet]. 2008 Jul  
950 20;27(16):2999–3016. Available from:

- 951 <http://www.ncbi.nlm.nih.gov/pmc/articles/PMC3951165/>
- 952 34. Kucharski A, Mills H, Pinsent A, Fraser C, Van Kerkhove M, Donnelly C, et al.  
953 Distinguishing Between Reservoir Exposure and Human-to-Human Transmission for  
954 Emerging Pathogens Using Case Onset Data. *PLoS Curr Outbreaks*. 2014;
- 955 35. Lo Iacono G, Cunningham AA, Fichet-Calvet E, Garry RF, Grant DS, Leach M, et al. A  
956 Unified Framework for the Infection Dynamics of Zoonotic Spillover and Spread. Foley J,  
957 editor. *PLoS Negl Trop Dis* [Internet]. 2016 Sep 2;10(9):e0004957. Available from:  
958 <http://www.ncbi.nlm.nih.gov/pmc/articles/PMC5010258/>
- 959 36. Keeling MJ, Woolhouse MEJ, Shaw DJ, Matthews L, Chase-Topping M, Haydon DT, et  
960 al. Dynamics of the 2001 UK Foot and Mouth Epidemic: Stochastic Dispersal in a  
961 Heterogeneous Landscape. *Science* (80- ) [Internet]. 2001;294(5543):813–7. Available  
962 from: <http://www.sciencemag.org/content/294/5543/813.abstract>
- 963 37. Höhle M, Jørgensen E, O’Neill PD. Inference in disease transmission experiments by  
964 using stochastic epidemic models. *J R Stat Soc Ser C (Applied Stat* [Internet].  
965 2005;54(2):349–66. Available from: [http://doi.org/10.1111/j.1467-](http://doi.org/10.1111/j.1467-9876.2005.00488.x)  
966 [9876.2005.00488.x](http://doi.org/10.1111/j.1467-9876.2005.00488.x)
- 967 38. Boender GJ, Hagenaars TJ, Bouma A, Nodelijk G, Elbers ARW, de Jong MCM, et al.  
968 Risk Maps for the Spread of Highly Pathogenic Avian Influenza in Poultry. *PLOS*  
969 *Comput Biol* [Internet]. 2007 Apr 20;3(4):e71. Available from:  
970 <https://doi.org/10.1371/journal.pcbi.0030071>
- 971 39. Ypma RJF, Bataille AMA, Stegeman A, Koch G, Wallinga J, van Ballegooijen WM.  
972 Unravelling transmission trees of infectious diseases by combining genetic and

- 973 epidemiological data. Proc R Soc B Biol Sci [Internet]. 2012;279(1728):444–50.  
974 Available from: <http://rspb.royalsocietypublishing.org/content/279/1728/444.abstract>
- 975 40. Cauchemez S, Nouvellet P, Cori A, Jombart T, Garske T, Clapham H, et al. Unraveling  
976 the drivers of MERS-CoV transmission. Proc Natl Acad Sci [Internet]. 2016 Aug  
977 9;113(32):9081–6. Available from: <http://www.pnas.org/content/113/32/9081.abstract>
- 978 41. Ball F, Mollison D, Scalia-Tomba G. Epidemics with Two Levels of Mixing. Ann Appl  
979 Probab [Internet]. 1997;7(1):46–89. Available from: <http://www.jstor.org/stable/2245132>
- 980 42. DEMIRIS N, O’NEILL PD. Bayesian inference for epidemics with two levels of mixing.  
981 Scand J Stat [Internet]. 2005;32(2):265–80. Available from:  
982 <http://doi.org/10.1111/j.1467-9469.2005.00420.x>
- 983 43. Ježek Z, Fenner F. Human monkeypox [Internet]. S Karger Ag; 1988. Available from:  
984 <http://books.google.com/books?id=fyupMQEACAAJ>
- 985 44. Yinka-Ogunleye A, Aruna O, Ogoina D, Aworabhi N, Eteng W, Badaru S, et al.  
986 Reemergence of Human Monkeypox in Nigeria, 2017. Emerg Infect Dis [Internet]. 2018  
987 Jun;24(6):1149–51. Available from:  
988 <http://www.ncbi.nlm.nih.gov/pmc/articles/PMC6004876/>
- 989 45. Centers for Disease Control and Prevention. About Monkeypox [Internet]. 2018 [cited  
990 2018 Oct 21]. Available from: <https://www.cdc.gov/poxvirus/monkeypox/about.html>
- 991 46. Vaughan A, Aarons E, Astbury J, Balasegaram S, Beadsworth M, Beck CR, et al. Two  
992 cases of monkeypox imported to the United Kingdom, September 2018. Eurosurveillance  
993 [Internet]. 2018;23(38). Available from: [https://doi.org/10.2807/1560-](https://doi.org/10.2807/1560-7917.ES.2018.23.38.1800509%0A)  
994 [7917.ES.2018.23.38.1800509%0A](https://doi.org/10.2807/1560-7917.ES.2018.23.38.1800509%0A)

- 995 47. World Health Organization. Monkeypox - Nigeria [Internet]. Disease Outbreak News.  
996 2018 [cited 2018 Oct 21]. Available from: [http://www.who.int/csr/don/05-october-2018-](http://www.who.int/csr/don/05-october-2018-monkeypox-nigeria/en/)  
997 [monkeypox-nigeria/en/](http://www.who.int/csr/don/05-october-2018-monkeypox-nigeria/en/)
- 998 48. World Health Organization. Monkeypox - Cameroon [Internet]. Disease Outbreak News.  
999 2018 [cited 2018 Oct 21]. Available from: [http://www.who.int/csr/don/05-june-2018-](http://www.who.int/csr/don/05-june-2018-monkeypox-cameroon/en/)  
1000 [monkeypox-cameroon/en/](http://www.who.int/csr/don/05-june-2018-monkeypox-cameroon/en/)
- 1001 49. Rimoin AW, Mulembakani PM, Johnston SC, Smith JOL, Kisalu NK, Kinkela TL, et al.  
1002 Major increase in human monkeypox incidence 30 years after smallpox vaccination  
1003 campaigns cease in the Democratic Republic of Congo. Proc Natl Acad Sci [Internet].  
1004 2010; Available from: <http://www.pnas.org/content/early/2010/08/24/1005769107.abstract>
- 1005 50. Public Health England. Monkeypox case in England [Internet]. GOV.UK. 2018 [cited  
1006 2018 Oct 21]. Available from: [https://www.gov.uk/government/news/monkeypox-case-in-](https://www.gov.uk/government/news/monkeypox-case-in-england)  
1007 [england](https://www.gov.uk/government/news/monkeypox-case-in-england)
- 1008 51. State of Isreal Ministry of Health. Monkeypox Patient Diagnosed [Internet]. State of Isreal  
1009 Ministry of Health: Press Releases. 2018 [cited 2018 Oct 21]. Available from:  
1010 [https://www.health.gov.il/English/News\\_and\\_Events/Spokespersons\\_Messages/Pages/121](https://www.health.gov.il/English/News_and_Events/Spokespersons_Messages/Pages/12102018_1.aspx)  
1011 [02018\\_1.aspx](https://www.health.gov.il/English/News_and_Events/Spokespersons_Messages/Pages/12102018_1.aspx)
- 1012 52. Ježek Z, Grab B, Szczeniowski M V, Paluku KM, Mutombo M. Human monkeypox:  
1013 secondary attack rates. Bull World Health Organ [Internet]. 1988;66(4):465–70. Available  
1014 from: <http://www.ncbi.nlm.nih.gov/pmc/articles/PMC2491159/>
- 1015 53. Fenner F, Henderson DA, Arita I, Jezek Z, Ladnyi ID. Smallpox and its Eradication.  
1016 World Health Organization; 1988.

- 1017 54. Lloyd-Smith JO, Schreiber SJ, Kopp PE, Getz WM. Superspreading and the effect of  
1018 individual variation on disease emergence. *Nature* [Internet]. 2005;438(November):355–9.  
1019 Available from: <http://www.ncbi.nlm.nih.gov/pubmed/16292310>
- 1020 55. le Polain de Waroux O, Cohuet S, Ndazima D, Kucharski AJ, Juan-Giner A, Flasche S, et  
1021 al. Characteristics of human encounters and social mixing patterns relevant to infectious  
1022 diseases spread by close contact: a survey in Southwest Uganda. *BMC Infect Dis*  
1023 [Internet]. 2018 Apr 11;18:172. Available from:  
1024 <http://www.ncbi.nlm.nih.gov/pmc/articles/PMC5896105/>
- 1025 56. Clark WA V., Avery KL. The effects of data aggregation in statistical analysis. *Geogr*  
1026 *Anal.* 1976;8:428–38.
- 1027 57. Openshaw S, Taylor PJ. A million or so correlation coefficients: three experiments on the  
1028 modifiable areal unit problem. *Stat Appl Spat Sci.* 1979;127–44.
- 1029 58. Beale L, Abellan JJ, Hodgson S, Jarup L. Methodologic issues and approaches to spatial  
1030 epidemiology. *Environ Health Perspect.* 2008;116:1105–10.
- 1031 59. Richter W. The verified neighbor approach to geoprivacy: An improved method for  
1032 geographic masking. *J Expo Sci Environ Epidemiol* [Internet]. 2017 Sep 20;28:109.  
1033 Available from: <http://dx.doi.org/10.1038/jes.2017.17>
- 1034 60. Zandbergen PA. Ensuring Confidentiality of Geocoded Health Data: Assessing  
1035 Geographic Masking Strategies for Individual-Level Data. *Adv Med* [Internet].  
1036 2014;2014. Available from: <https://doi.org/10.1155/2014/567049>
- 1037 61. Sebastian J. Schreiber, James O. Lloyd-Smith. Invasion Dynamics in Spatially  
1038 Heterogeneous Environments. *Am Nat* [Internet]. 2009;174(4):490–505. Available from:



- 1039 <http://www.jstor.org/stable/10.1086/605405>
- 1040 62. Arita I, Wickett J, Fenner F. Impact of Population Density on Immunization Programmes.  
1041 J Hyg (Lond) [Internet]. 1986;96(3):459–66. Available from:  
1042 <http://www.jstor.org/stable/3863139>
- 1043 63. Grenfell, Bolker. Cities and villages: infection hierarchies in a measles metapopulation.  
1044 Ecol Lett [Internet]. 1998 Jul 1;1(1):63–70. Available from:  
1045 <http://dx.doi.org/10.1046/j.1461-0248.1998.00016.x>
- 1046 64. Neiderud C-J. How urbanization affects the epidemiology of emerging infectious diseases.  
1047 Infect Ecol Epidemiol [Internet]. 2015 Jun 24;5:10.3402/iee.v5.27060. Available from:  
1048 <http://www.ncbi.nlm.nih.gov/pmc/articles/PMC4481042/>
- 1049 65. NISHIURA H, EICHNER M. Infectiousness of smallpox relative to disease age: estimates  
1050 based on transmission network and incubation period. Epidemiol Infect [Internet]. 2007  
1051 Oct 7;135(7):1145–50. Available from:  
1052 <http://www.ncbi.nlm.nih.gov/pmc/articles/PMC2870668/>
- 1053 66. Fine PEM. The Interval between Successive Cases of an Infectious Disease. Am J  
1054 Epidemiol [Internet]. 2003 Dec 1;158(11):1039–47. Available from:  
1055 <http://dx.doi.org/10.1093/aje/kwg251>
- 1056 67. Gelman A, Rubin DB. Inference from Iterative Simulation Using Multiple Sequences. Stat  
1057 Sci [Internet]. 1992;7(4):457–72. Available from:  
1058 <https://projecteuclid.org:443/euclid.ss/1177011136>
- 1059 68. Brooks SP, Gelman A. General Methods for Monitoring Convergence of Iterative  
1060 Simulations. J Comput Graph Stat [Internet]. 1998 Dec 1;7(4):434–55. Available from:

- 1061 <https://www.tandfonline.com/doi/abs/10.1080/10618600.1998.10474787>
- 1062 69. Burnham KP, Anderson DR. Model Selection and Multimodel Inference: A Practical  
1063 Information-Theoretic Approach. 2nd ed. New York: Springer-Verlag New York, Inc;  
1064 2002.
- 1065 70. Spiegelhalter D, Best N, P Carlin B. Bayesian Deviance, the Effective Number of  
1066 Parameters, and the Comparison of Arbitrarily Complex Models. Vol. 64, Journal of  
1067 Royal Statistical Society. 1998.
- 1068 71. Wallace JR. Imap: Interactive Mapping [Internet]. 2012. p. R package version 1.32.  
1069 Available from: <https://cran.r-project.org/package=Imap>
- 1070 72. Anonymous. The current status of human monkeypox: Memorandum from a WHO  
1071 meeting. Bull World Health Organ [Internet]. 1984;62(5):703–13. Available from:  
1072 <https://www.ncbi.nlm.nih.gov/pmc/articles/PMC2536211/pdf/bullwho00094-0031.pdf>
- 1073 73. Jezek Z, Marennikova SS, Mutumbo M, Nakano JH, Paluku KM, Szczeniowski M.  
1074 Human Monkeypox: A Study of 2,510 Contacts of 214 Patients. Vol. 154, The Journal of  
1075 infectious diseases. 1986. 551-555 p.
- 1076
- 1077

1078 **Supporting information captions**

1079

1080 **S1 Text. Additional information on methods.** Supplementary text describing the corrected-  
1081 denominator likelihood, the estimation of the total number of localities under surveillance, the  
1082 simulation methods, and the sensitivity analyses.

1083

1084 **S1 Fig. Effect of assumed fraction of localities observed on parameter estimates.** The true  
1085 parameter values are indicated by a large black dot and while smaller points indicate the inferred  
1086 values from 25 simulated datasets (lines show the 95% credible interval). For each dataset,  
1087 inference was performed assuming that 1/5, 1/2, and all of the localities under surveillance were  
1088 observed. For these simulations, the true percentage of localities observed ranged from 46% to  
1089 57%, with a mean of 52%.

1090

1091 **S2 Fig. Estimated number of localities under surveillance** (calculated given the number of  
1092 observed localities and the estimated parameter values). Large colored dots indicate the  
1093 estimated number of localities under surveillance for each simulated dataset while the smaller  
1094 dots show the number of localities observed in the dataset. The true number of localities is  
1095 represented by the horizontal dashed line. Each color corresponds to a different parameter set  
1096 used for simulations.

1097

1098 **S3 Fig. Accuracy of inferred transmission trees at inferring the correct source of cases.** For  
1099 each simulated dataset (25 simulations for each of 5 parameter sets), 200 transmission trees were  
1100 drawn. Points show the mean fraction of cases inferred correctly in a sampled transmission tree  
1101 and bars indicate the standard deviation.

1102

1103 **S4 Fig. Inferred sources of monkeypox cases. A.** The fraction of cases inferred to have  
1104 originated from each source using each of the four spatial models (locality-green, district-blue,  
1105 region-purple, country-red). **B.** Difference in the proportion of inter-locality human-to-human  
1106 transmissions inferred by the models to occur over a given transmission distance versus expected  
1107 based on the spatial distribution of localities. The p-values indicate the probability of observing  
1108 as many or more transmissions over distances of  $\leq 30$  kilometers based on the null model (i.e.  
1109 assuming distance plays no role in determining which localities are linked by inferred  
1110 transmission events). The median p-value of sampled transmission trees is given, and the full  
1111 distribution of p-values can be seen in S5 Fig.

1112

1113 **S5 Fig. The distribution of p-values obtained across sampled transmission trees.** P-values  
1114 obtained from a binomial test examining whether the number of transmission events inferred to  
1115 occur across thirty or fewer kilometers is greater than that expected based on the null  
1116 distribution. Each p-value corresponds to a sampled transmission tree.

1117

1118 **S6 Fig. Comparison of epidemiologically contact-traced links with sampled transmission**  
1119 **trees.** Circles (left axis) show the fraction of sampled trees that infer the epidemiologically-  
1120 traced source. Open circles represent inter-locality links while closed circles represent intra-  
1121 locality links. Bars (right axis) indicate the probability that a link is instead inferred to have a  
1122 zoonotic source. Results are shown for models that use the country-level (red), region-level  
1123 (purple), district-level (blue), and locality-level (green) broader contact zones. Links are sorted  
1124 from lowest to highest success in the district model.

1125

1126 **S7 Fig. Effect of increasing spillover rate on parameter estimate success.** Within each color,  
1127 large points outlined in black indicate the true parameter set and smaller points indicate the  
1128 inferred parameter values from 25 simulated datasets (lines show the 95% credible interval).  
1129 Warmer colors correspond with higher spillover rates. Note the log-scale x-axis.

1130

1131 **S8 Fig. Parameter estimate residuals for data simulated using a negative binomial versus**  
1132 **Poisson offspring distribution.** Because the inference method assumes a Poisson offspring  
1133 distribution, we compared the inference successes for datasets simulated assuming a Poisson  
1134 offspring distribution versus datasets simulated assuming a negative binomial offspring  
1135 distribution. The residuals in parameter estimates for 25 simulations are shown for **A)** the  
1136 reproductive number and **B)** the spillover rate.

1137

1138 **S9 Fig. Strongly heterogeneous spillover causes bias in parameter estimates.** The true  
1139 parameter value is indicated by the large dot while smaller points indicate the inferred values  
1140 from 25 simulated datasets (lines show the 95% credible interval). Simulations were conducted  
1141 to mimic pockets of zoonotic disease moving through the reservoir population. To capture the  
1142 idea that, at any given time, only a small subset of localities might be experiencing high levels of  
1143 spillover while the rest of the localities experienced no spillover, the simulations assumed that  
1144 every 25 days a new set of three localities experienced the full force of spillover for the entire  
1145 system. This gave rise to clusters of primary cases, which tend to be misclassified as human-to-  
1146 human transmission events by our inference approach, which assumes homogeneous spillover  
1147 rates.

1148

1149 **S10 Fig. Comparison of prior and posterior distributions for spillover rate  $\lambda_z$ .** Black bars  
1150 represent posterior distribution while red lines mark limits of the uniform prior distribution. One  
1151 representative simulation is shown for each of the nine parameter sets. Notice that the posterior  
1152 distribution is always relatively far from upper bound of the prior.

1153

1154 **S1 Table. Comparison of inference method success over the same simulated datasets.**

1155

1156 **S2 Table. Success of the corrected denominator inference method for datasets simulated  
1157 with increasing spillover rates.**

1158

1159 **S3 Table. Success of the corrected denominator inference method for datasets simulated**  
1160 **with different offspring distributions.**

1161

1162 **S4 Table. Comparison of parameter estimates inferred using models of increasing spatial**  
1163 **scale – data simulated using the ‘nearest five neighbors’ inter-locality transmission rule**  
1164 **where localities take the same GPS coordinates as in the DRC monkeypox surveillance dataset**  
1165 **(true R is 0.36, true spillover rate is 0.00036; mean parameter estimates from inference on 25**  
1166 **simulated datasets).**

1167

1168 **S5 Table. Comparison of parameter estimates inferred using models of increasing spatial**  
1169 **scale – data simulated assuming inter-locality transmission can occur between any localities**  
1170 **located within 30 km of one another, where localities take the same GPS coordinates as in the**  
1171 **DRC monkeypox surveillance dataset (true R is 0.36, true spillover rate is 0.00036; mean**  
1172 **parameter estimates from inference on 25 simulated datasets).**

1173

1174 **S6 Table. Description of datasets simulated.**

1175

1176 **S7 Table. Parameter descriptions.**

1177

1178 **S1 Data. Case records.** For all individuals included in the analyses, records the case  
1179 identification number, the locality identification number, the day of surveillance when disease  
1180 onset occurred (the first day of fever when known, otherwise the first day of the rash), the names  
1181 of the district and region where the case occurred, and masked GPS coordinates of the locality.  
1182 The geographic masking technique known as ‘donut masking’ was used to obscure the exact  
1183 location of cases and preserve privacy. For each locality with a recorded location, two random  
1184 values were drawn: the first determines the direction and the second determines the distance  
1185 from the original point. The new location is within 0.1 degrees from the original point but not  
1186 closer than 0.02 degrees.

1187

1188 **S2 Data. Contact-tracing links.** Each row provides the case identification numbers for a pair of  
1189 cases that was identified as a probable transmission link through epidemiological contact-tracing.

1190

1191



**Fig 1**

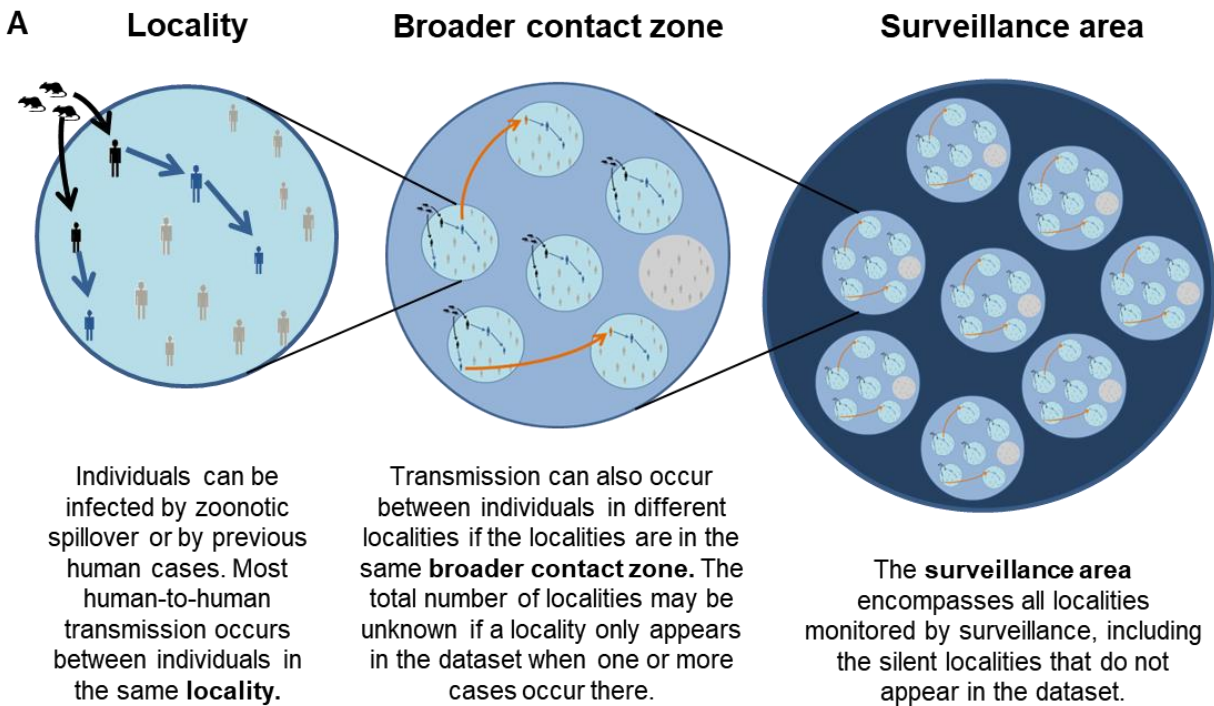

**B**      **Possible transmission sources of a case observed on day  $t$ , locality  $v$ :**

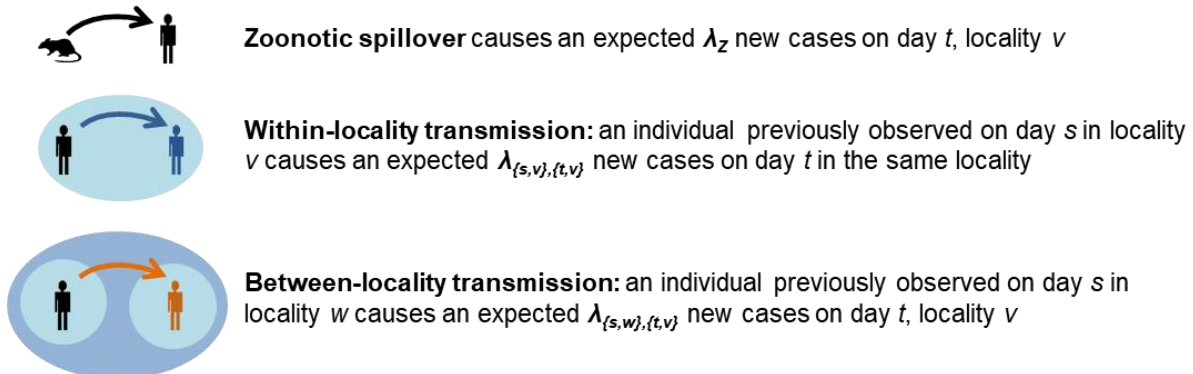

**Fig 2**

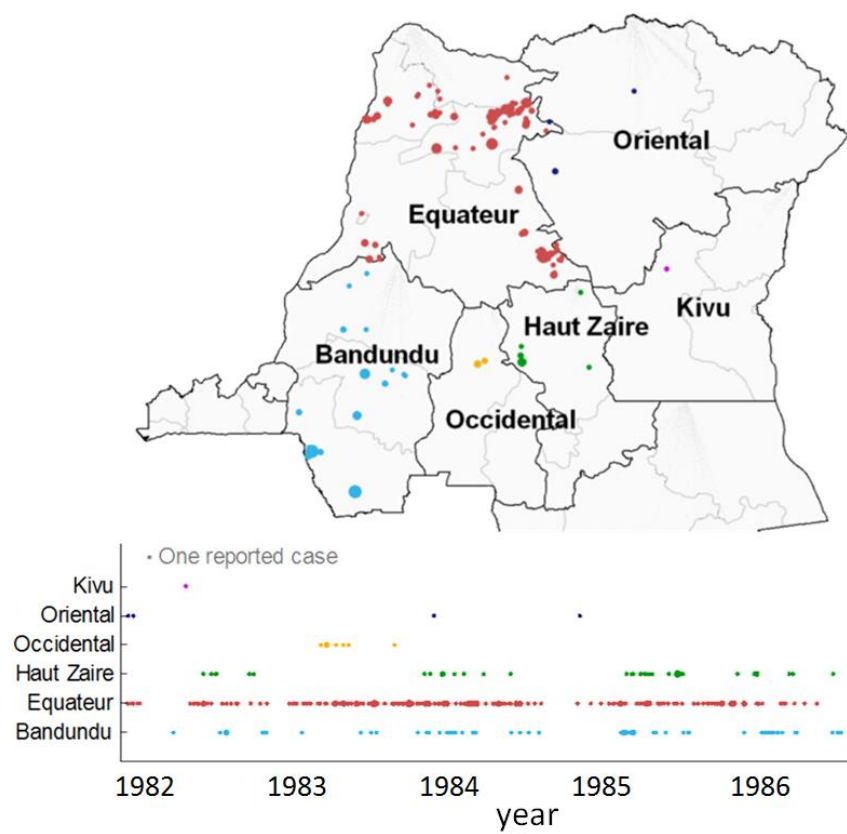

**Fig 3**

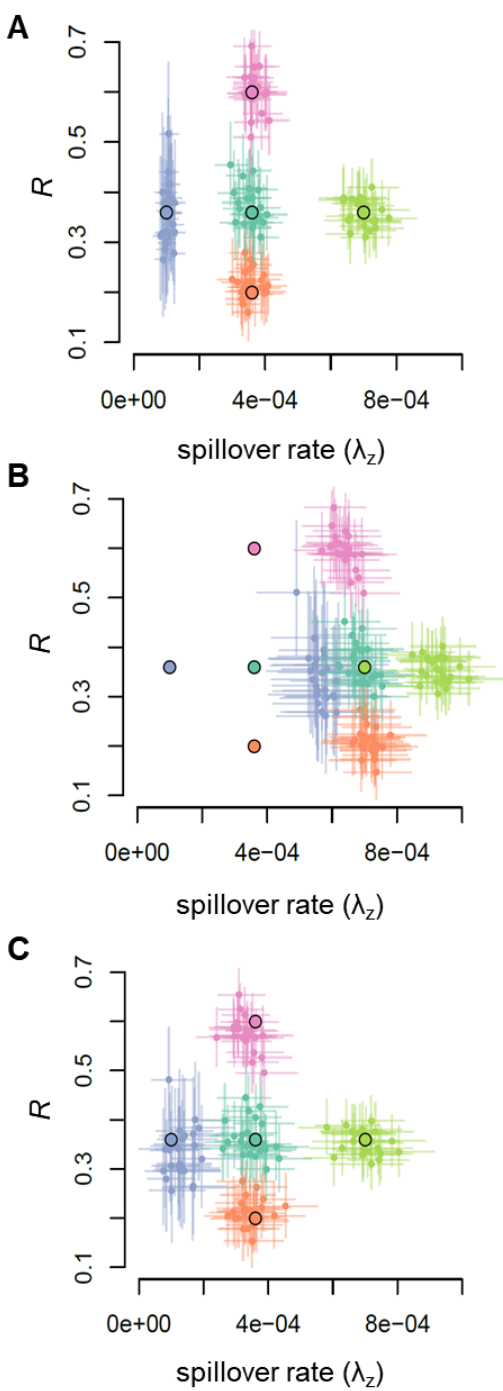

**Fig 4**

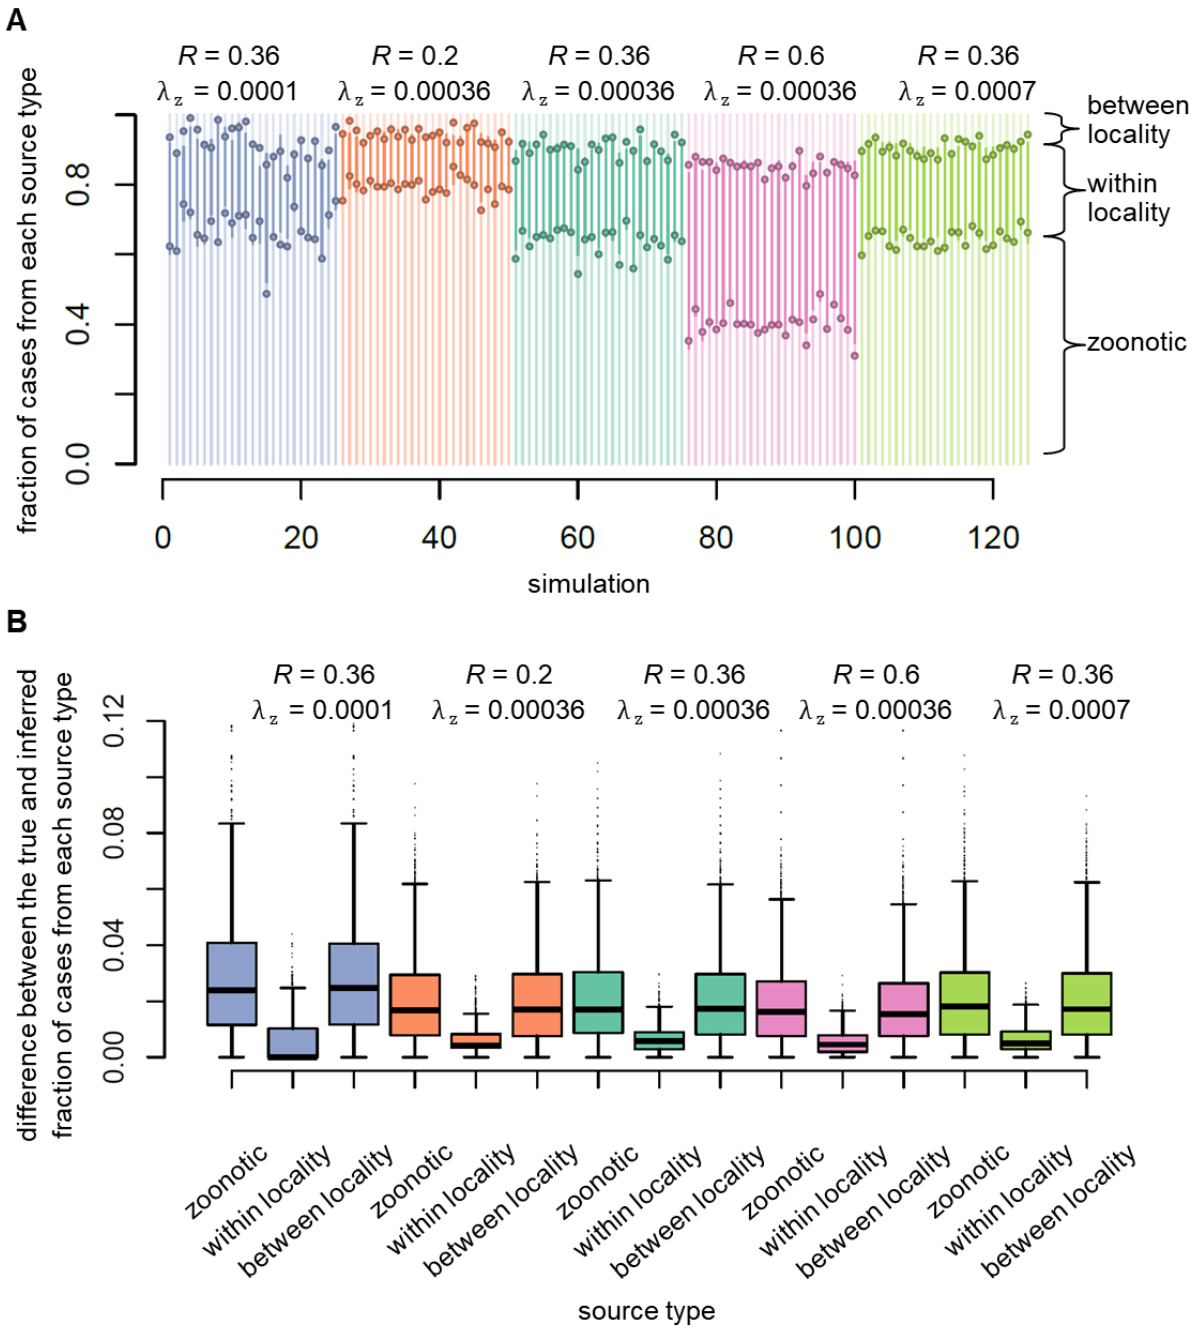

**Fig 5**

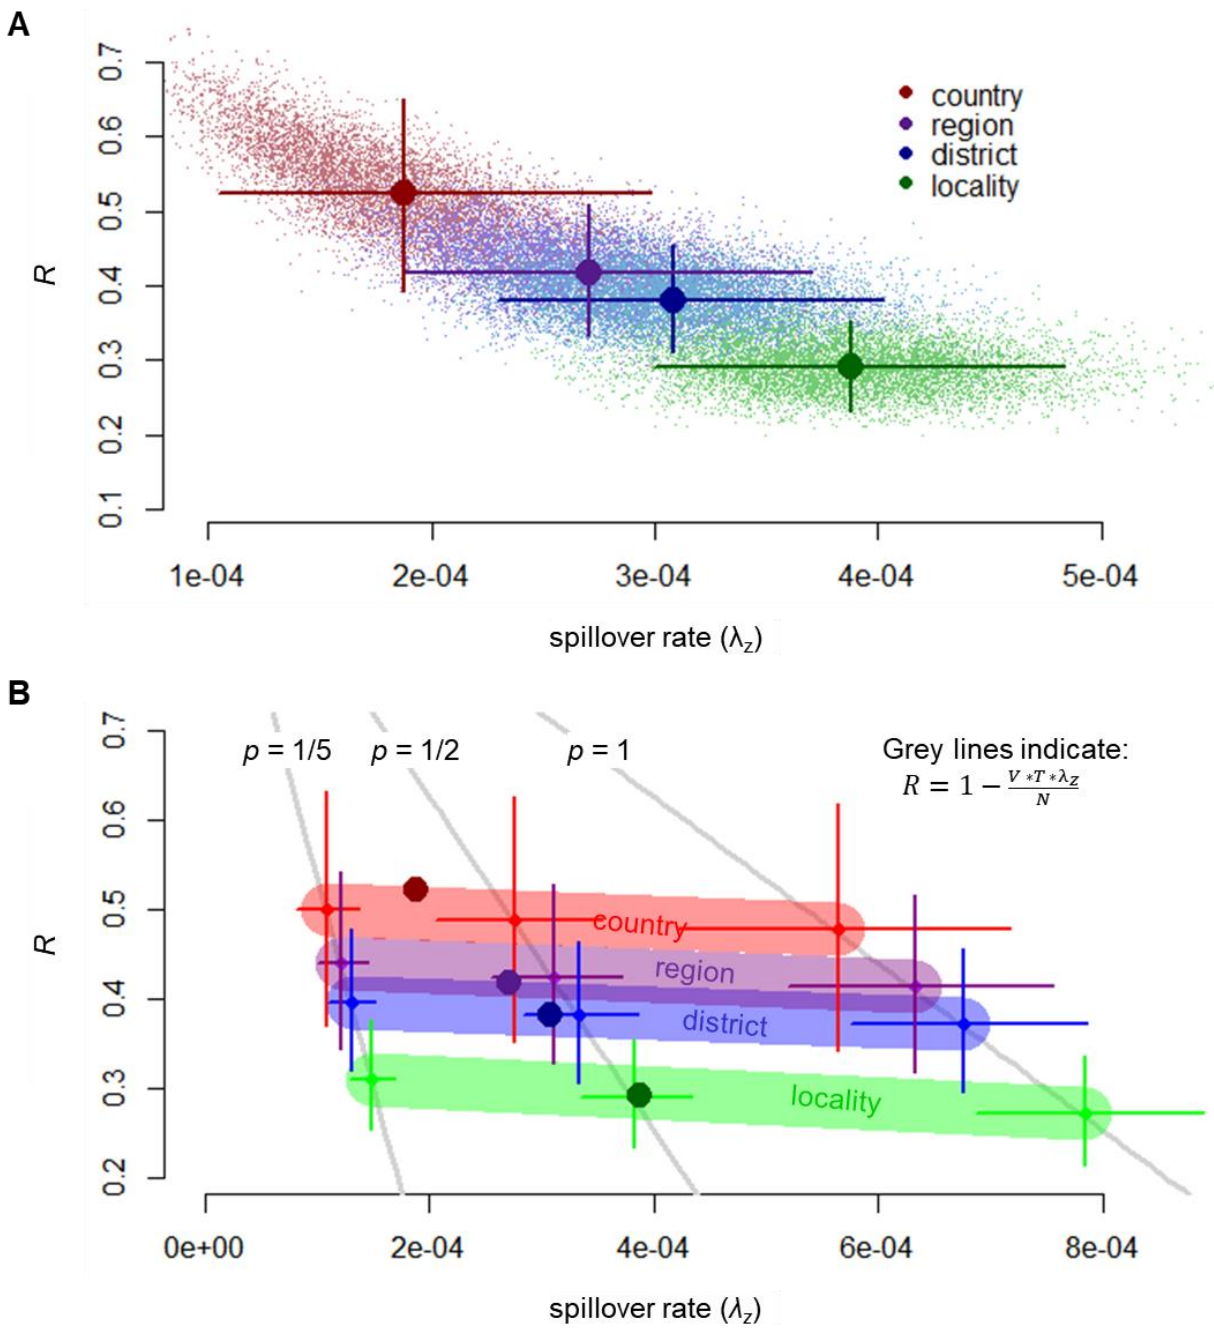

**Fig 6**

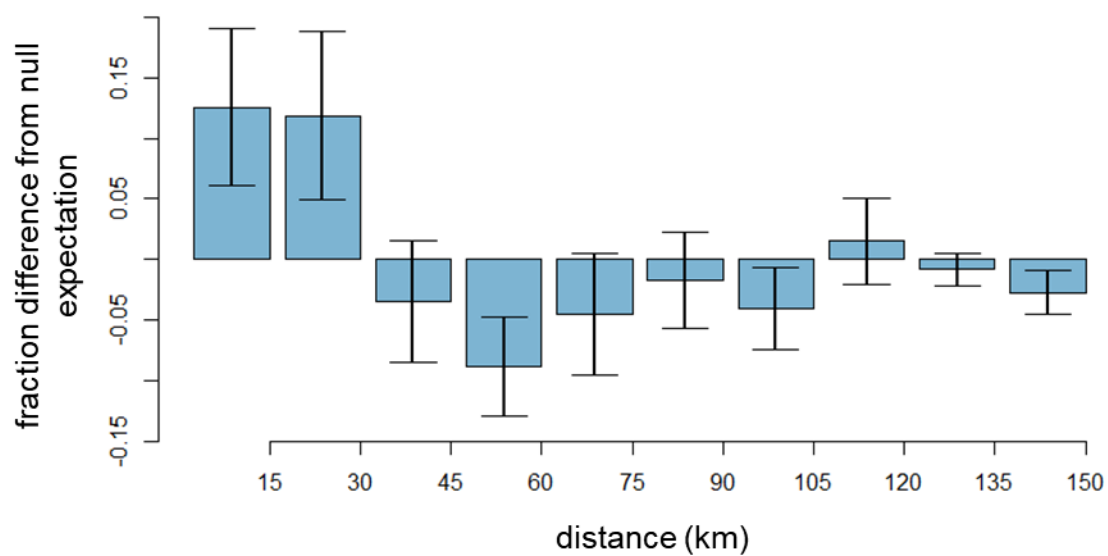

**Fig 7**

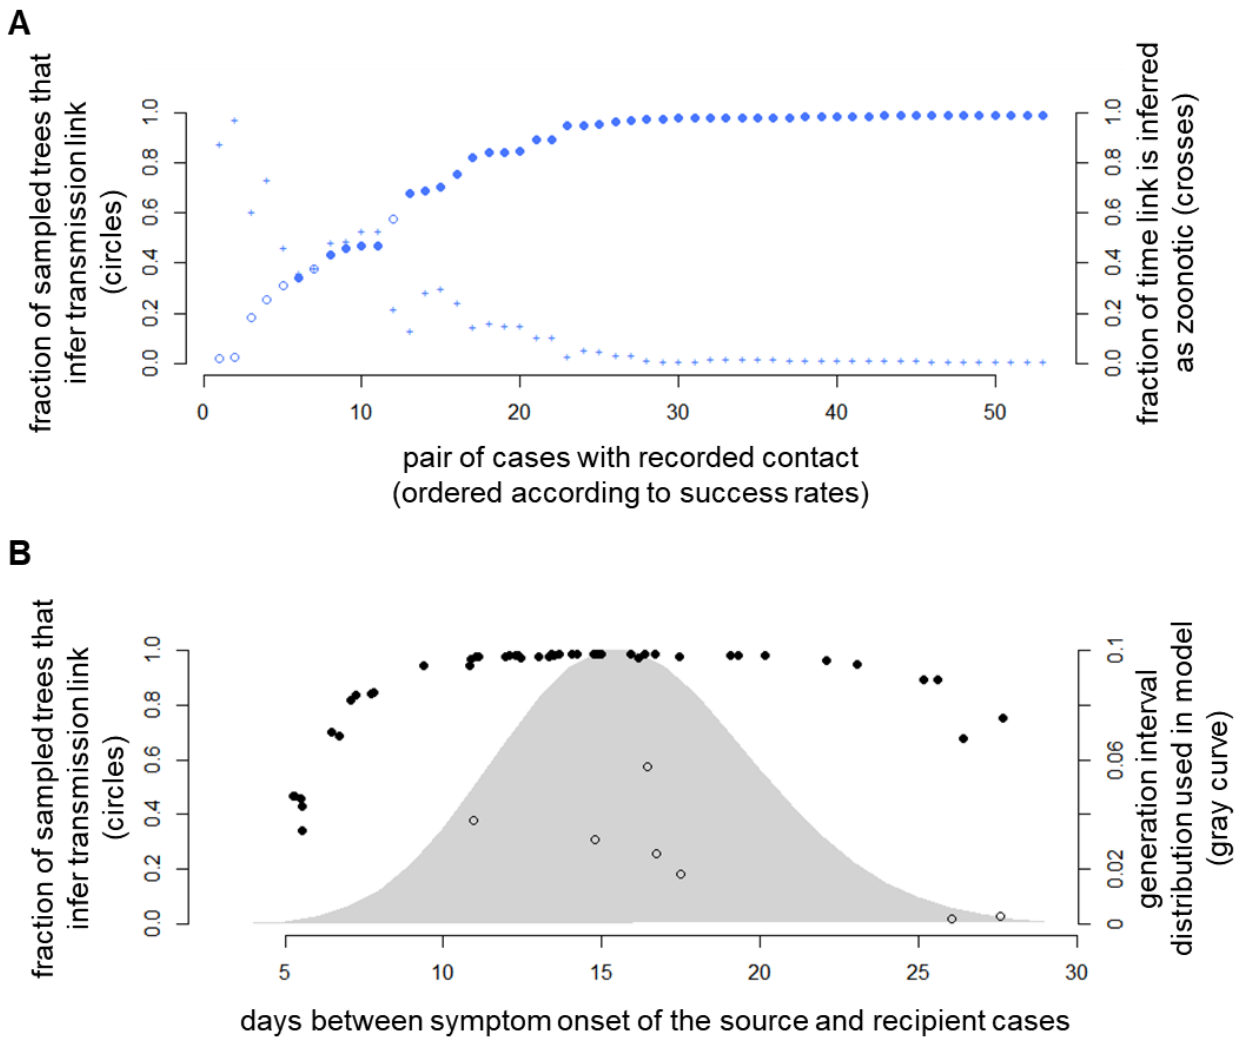

## Fig 8

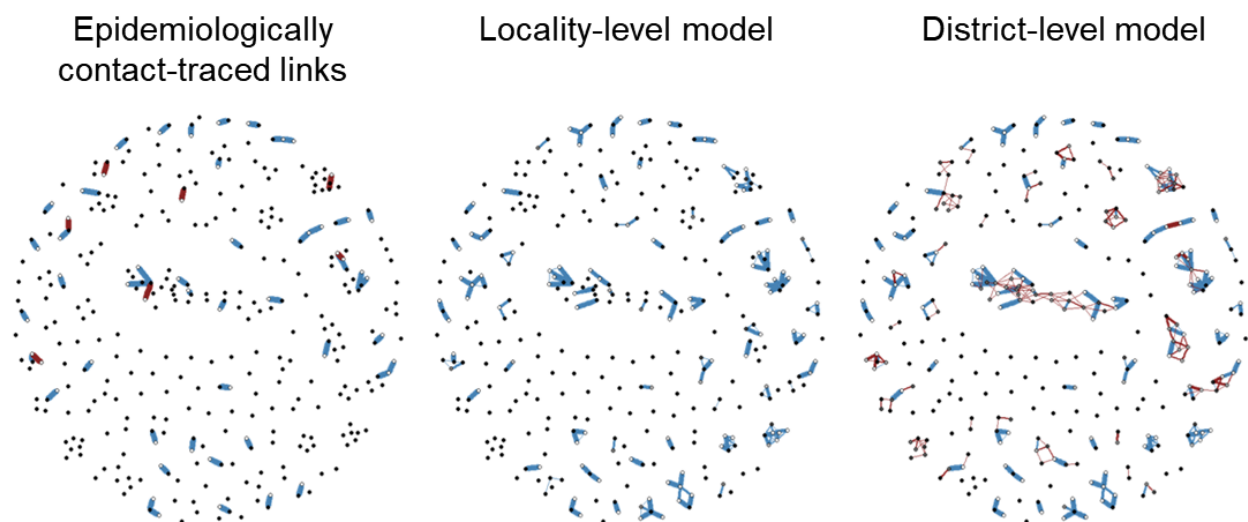



## S1 Text. Supplementary material on methods

### 1192 **Corrected denominator method: Derivation for the conditional likelihood** 1193 **function**

1194 The model described in the main text tells us that the number of new human cases on day  
1195  $t$  in locality  $v$  follows a Poisson distribution with mean

$$1196 \quad \mu_{t,v} = \sum_{s=1}^{t-1} \sum_{w=1}^{\mathcal{V}} [N_{s,w} * \lambda_{\{s,w\},\{t,v\}}] + \lambda_z, \quad (1)$$

1197 which represents the sum of the expected numbers of cases caused by spillover and all previous  
1198 human cases (S7 Table provides a description of parameters). Based on this model, the  
1199 likelihood of a set of parameters ( $\theta = \{R, \lambda_z, \sigma\}$ ) given surveillance data ( $D = N_{t,v}$  cases  
1200 observed on each day  $t$  and locality  $v$ ) is:

$$1201 \quad \mathcal{L}(\theta|D) = \prod_{t=1}^T \prod_{v=1}^{\mathcal{V}} \frac{e^{-\mu_{t,v}} \mu_{t,v}^{N_{t,v}}}{N_{t,v}!}. \quad (2)$$

1202 A challenge in applying this likelihood function to surveillance data arises when the total  
1203 number of localities under surveillance,  $V$ , is unknown. Instead, we observe  $W$  localities that  
1204 have one or more observed cases. If we re-arrange the product functions in the likelihood  
1205 function, it becomes more apparent that we are taking the product of the likelihood for each  
1206 locality:

$$1207 \quad \mathcal{L}(\theta|D) = \prod_{v=1}^V \prod_{t=1}^T \frac{e^{-\mu_{t,v}} \mu_{t,v}^{N_{t,v}}}{N_{t,v}!}. \quad (3)$$

1208 However, because we only observe localities with one or more cases in the surveillance data, we  
1209 need that conditioning to be reflected in the likelihood. In other words, we now want to express  
1210 the likelihood of a particular time-series of cases in a locality *conditional on that locality having*

1211 *one or more cases*. This can be done for each locality by multiplying its component of the  
1212 likelihood by the inverse of the probability ( $q$ ) of having one or more cases:

$$1213 \quad \mathcal{L}(\theta|D) = \prod_{w=1}^W \frac{\prod_{t=1}^T \frac{e^{\mu_{t,w}} \mu_{t,w}^{N_{t,w}}}{N_{t,w}!}}{q} . \quad (4)$$

1214 It is now necessary to calculate the probability a surveilled locality experiences one or  
1215 more cases. This probability is equivalent to one minus the probability of no cases occurring at a  
1216 locality during the surveillance period. The following section explains how the probability of  
1217 zero cases occurring at a given locality (here denoted  $p$ ) is calculated.

1218 For zero cases to occur in a locality, there must be no zoonotic spillover into that locality  
1219 as well as no human-to-human transmission from an outside locality. The zoonotic component is  
1220 relatively straightforward to calculate, as it is simply the probability of zero spillover events on  
1221 each of the  $T$  days (which equals  $e^{-\lambda_z T}$ ). The probability of no transmission from an outside  
1222 human source is a bit more complicated and can be broken down by the generation of the outside  
1223 case to avoid double-counting. The generation of a case indicates how many human-to-human  
1224 transmission events occurred leading to the case. We refer to cases resulting from zoonotic  
1225 spillover as primary cases. Individuals infected by primary cases are second generation cases,  
1226 individuals infected by second generation cases are third generation cases, etc. For there to be no  
1227 cases in a locality, no transmission may have occurred into that locality from outside cases in any  
1228 generation:

$$\begin{aligned}
 &P(\text{no transmission from cases in other localities}) \\
 &= P(\text{no transmission from primary cases}) \\
 &* P(\text{no transmission from second generation cases} | \text{no transmission from primary cases}) \\
 &* P(\text{no transmission from third generation cases} | \text{no transmission from primary or second generation cases}) \\
 &* \dots
 \end{aligned}$$

1229           The number of cases caused by a given case (of any generation) in the target locality is  
 1230 described by a Poisson distribution with expected value equal to  $R \frac{(1-\sigma)}{(\mathcal{V}_w-1)}$ , where  $\mathcal{V}_w$  is the  
 1231 number of localities within the target locality's broader contact zone. Because each case  
 1232 transmits disease independently of one another (conditioned on the previous cases), the  
 1233 probability that no generation  $i$  cases cause infections in the target locality is  $e^{-R \frac{(1-\sigma)}{(\mathcal{V}_w-1)} n_i}$ , where  
 1234  $n_i$  is the total number of  $i^{\text{th}}$  generation cases within the broader contact zone (given knowledge  
 1235 that none of the cases from previous generations transmitted to the target locality). Incorporating  
 1236 this information, the probability of observing zero cases in a locality ( $p$ ) becomes:

$$\begin{aligned}
 1237 \quad p &= e^{-\lambda_z T} * \prod_{i=1}^{\infty} e^{-R \frac{(1-\sigma)}{(\mathcal{V}_w-1)} n_i} \\
 1238 \quad &= e^{-\lambda_z T} * e^{-R \frac{(1-\sigma)}{(\mathcal{V}_w-1)} \sum_{i=1}^{\infty} n_i} . \qquad (5)
 \end{aligned}$$

1239           We next need to calculate estimates for the expected values of each of the  $n_i$ . The  
 1240 expected number of primary cases in the entire broader contact zone (given that no spillover  
 1241 events occurred into the target locality) is the expected number of spillover events per locality  
 1242 ( $\lambda_z$ ) multiplied by the number of localities under consideration ( $\mathcal{V}_w - 1$ ), multiplied by the  
 1243 number of surveillance days ( $T$ ). For subsequent case generations, we can calculate the expected  
 1244 number of cases in generation  $i+1$  as the number of cases caused by the  $i^{\text{th}}$  generation in their

1245 own localities plus those caused in the  $\mathcal{V}_w - 2$  other possible localities (there are  $\mathcal{V}_w - 2$  other  
 1246 possible localities because the case's current locality and the target locality have already been  
 1247 counted):

$$\begin{aligned}
 1248 \quad \mathbb{E}[n_{i+1}] &= n_i \left( R\sigma + R \sum_{v=1}^{\mathcal{V}_w-2} \frac{(1-\sigma)}{(\mathcal{V}_w-1)} \right) \\
 1249 \quad &= R n_i \frac{(\mathcal{V}_w + \sigma - 2)}{(\mathcal{V}_w - 1)}. \tag{6}
 \end{aligned}$$

1250 If we approximate the values of  $n_i$  with  $\mathbb{E}[n_i]$ , we get

$$1251 \quad \mathbb{E}[n_{i+1}] \approx \lambda_z T (\mathcal{V}_w - 1) \left[ R \frac{(\mathcal{V}_w + \sigma - 2)}{(\mathcal{V}_w - 1)} \right]^i. \tag{7}$$

1252 Returning to our estimation of  $p$ , we can approximate  $n_i$  values with  $\mathbb{E}[n_i]$  and get

$$\begin{aligned}
 1253 \quad p &\approx e^{-\lambda_z T} * e^{-R \frac{(1-\sigma)}{(\mathcal{V}_w-1)} \sum_{i=1}^{\infty} \mathbb{E}[n_i]} \\
 1254 \quad &= e^{-\lambda_z T} * e^{-R \frac{(1-\sigma)}{(\mathcal{V}_w-1)} \sum_{j=0}^{\infty} \lambda_z T (\mathcal{V}_w - 1) \left[ R \frac{(\mathcal{V}_w + \sigma - 2)}{(\mathcal{V}_w - 1)} \right]^j} \\
 1255 \quad &= e^{-\lambda_z T} * e^{-R \frac{(1-\sigma)}{(\mathcal{V}_w-1)} * \frac{\lambda_z T (\mathcal{V}_w - 1)}{1 - R \frac{(\mathcal{V}_w + \sigma - 2)}{(\mathcal{V}_w - 1)}}} \\
 1256 \quad &= e^{-\lambda_z T} * e^{-\frac{R \lambda_z T (1-\sigma) (\mathcal{V}_w - 1)}{\mathcal{V}_w - 1 - R (\mathcal{V}_w + \sigma - 2)}} \\
 1257 \quad &= e^{-\lambda_z T - \frac{R \lambda_z T (1-\sigma) (\mathcal{V}_w - 1)}{\mathcal{V}_w - 1 - R (\mathcal{V}_w + \sigma - 2)}}. \tag{8}
 \end{aligned}$$

1258 With some additional algebraic simplification, we can insert this value in the original equation:

$$1259 \quad \mathcal{L}(\theta|D) = \prod_{w=1}^W \frac{\prod_{t=1}^T \frac{e^{\mu_{t,w}} \mu_{t,w}^{N_{t,w}}}{N_{t,w}!}}{1 - e^{-\lambda_z T - \frac{R \lambda_z T (1-\sigma) (\mathcal{V}_w - 1)}{\mathcal{V}_w - 1 - R (\mathcal{V}_w + \sigma - 2)}}}. \tag{9}$$

1260 This expression still includes the parameter  $\mathcal{V}_w$ , though fortunately the sensitivity of results to the  
1261 value of this parameter is relatively low. We therefore approximate  $\mathcal{V}_w$  using the expected  
1262 number of localities under surveillance in the broader contact zone. This calculation is explained  
1263 in the following section.

## 1264 **Estimating total number of localities under surveillance**

1265 We wish to use the estimated parameter values for  $R$ ,  $\lambda_z$ , and  $\sigma$  in conjunction with the  
1266 number of observed localities in a broader contact zone ( $W_w$ ) to estimate the total number of  
1267 localities under surveillance in that broader contact zone ( $V_w$ ). If we let  $q$  be the probability a  
1268 locality is observed (has one or more cases during the surveillance period), then we expect  $V_w * q$   
1269  $\approx W_w$ . From the section above, we approximate  $q = 1-p$  as:

$$1270 \quad q \approx 1 - e^{-\lambda_z T - \frac{R \lambda_z T (1-\sigma)(\mathcal{V}_w - 1)}{\mathcal{V}_w - 1 - R(\mathcal{V}_w + \sigma - 2)}}. \quad (10)$$

1271 So we estimate  $V_w$  as the value that satisfies the equation:

$$1272 \quad 0 = \mathcal{V}_w \left( 1 - e^{-\lambda_z T - \frac{R \lambda_z T (1-\sigma)(\mathcal{V}_w - 1)}{\mathcal{V}_w - 1 - R(\mathcal{V}_w + \sigma - 2)}} \right) - W_w. \quad (11)$$

## 1273 **Simulation methods**

### 1274 **Simulations with exact spatial locations**

1275 Although the model assumes that inter-locality transmission with a broader contact zone  
1276 is equal between all locality pairs, we expect that the actual amount of shared transmission  
1277 between two localities is strongly influenced by the distance between those localities. We  
1278 conducted two simulations using localities with set geographic locations and inter-locality

1279 transmissions depending on the spatial relationship of the localities. We took the 178 GPS  
1280 records available from monkeypox surveillance in the DRC during the 1980s and simulated  
1281 transmission across localities with the same coordinates and the same district and region  
1282 boundaries. Two types of inter-locality transmission rules were explored. In the first of these,  
1283 inter-locality transmissions were assumed to occur equally into a source locality's five closest  
1284 neighbors. In the second set of simulations, inter-locality transmissions from a source locality  
1285 were assumed to occur equally among all outside localities within 30 km of the source locality.

### 1286 **Simulations with highly structured and non-homogeneous spillover patterns**

1287 To illustrate how highly structured and non-homogeneous spillover could bias parameter  
1288 estimates, we simulated an extreme case of a zoonotic epidemic traveling through time and  
1289 space. We imagined that disease dynamics in the reservoir would occur in a single location for  
1290 25 days before moving to a new spot, in an extreme form of a traveling zoonotic epidemic. For  
1291 each 25 day period, three localities (selected to be in the same district when possible) would be  
1292 selected to experience all of the spillover in the entire system. Aside from this extreme spillover  
1293 pattern, the simulation followed the district-level model.

### 1294 **Sensitivity analyses**

#### 1295 **Sensitivity of parameter inference to elevated or heterogeneous spillover**

1296 To test whether a high rate of spillover would inundate the system with so many cases  
1297 that the temporal clustering patterns resulting from human-to-human transmission could be  
1298 obscured, we simulated datasets with spillover rates up to 0.1. This value corresponds with an  
1299 expected 59,312.5 spillover events during the five year simulation, which corresponds to an

1300 average of 36.5 per year in each locality. At this rate of spillover, there is an average of only ten  
1301 days between spillover events, a shorter period than the mean generation time for human-to-  
1302 human transmission events, which was sixteen days. Across the range of spillover rates tested,  
1303 the method did very well at both point estimates and capturing the true parameter values within  
1304 the 95% CI (an average of 94.3% of CIs included the true value of  $R$  and 94.9% included the true  
1305 value of  $\lambda_z$ ; S7 Fig, S2 Table). As the spillover rate increased from 0.0001 to 0.1, estimates of  $R$   
1306 tended to improve (posterior means closer to true value and smaller CIs). While the absolute  
1307 error on estimates of  $\lambda_z$  increased as spillover rate increased, the relative error tended to decrease.  
1308 As such, it appears that elevated spillover rates, far from obscuring patterns, may actually  
1309 correspond with improved estimates, presumably due to the increased inference power resulting  
1310 from a larger number of cases.

1311 Spillover is unlikely to occur homogeneously through time and space in real-world  
1312 settings. As an illustration of the potential effect this occurrence could have on parameter  
1313 estimates, we simulated an extreme case (see ‘Simulations with highly structured and non-  
1314 homogeneous spillover patterns,’ above) where spillover occurs into three localities at a time.  
1315 The parameter inference results for this situation were strongly biased (S10 Fig).

### 1316 **Sensitivity of parameter inference to offspring distribution assumptions**

1317 The model used in this study assumes that the number of new cases caused by an  
1318 infectious individual follows a Poisson distribution, but previous work suggests that the offspring  
1319 distribution is often better characterized by a negative binomial distribution, which allows for a  
1320 greater amount of variation between individuals [1]. We simulated datasets using a negative  
1321 binomial offspring distribution (using a dispersion parameter  $k=0.58$  in accordance with previous

1322 estimates for monkeypox from [1]) and examined how well our inference method, which  
1323 assumes a Poisson offspring distribution, estimated the true parameter values. Estimates for these  
1324 datasets were only marginally less accurate than estimates for datasets generated with a Poisson  
1325 offspring distribution (with an average percent error of 10.9% as opposed to 8.2% for  $R$  and of  
1326 11.6% as opposed to 10.4% for spillover rate estimates) (S8 Fig, S3 Table). As such, there are  
1327 unlikely to be strong biases introduced from a mis-specified offspring distribution for the  
1328 monkeypox dataset, though this bias could increase if applied to pathogens with more extreme  
1329 transmission variance.

### 1330 **Sensitivity of parameter inference to broader contact zone assumption**

1331 To examine how assuming different broader contact zones would affect inference results,  
1332 we compared parameter estimates obtained under three choices of broader contact zones for data  
1333 simulated under two inter-locality transmission rules. We simulated disease spread in a system  
1334 where localities were placed in the same arrangement as seen in 178 localities with GPS  
1335 coordinates included in the monkeypox surveillance system, district and region arrangement  
1336 were the same as in the 1980s surveillance, and human-to-human transmission could occur either  
1337 between a locality and its five closest neighbors or between localities located within 30 km of  
1338 one another. Inference results again showed increasing estimates of  $R$  and decreasing estimates  
1339 of spillover rate as the size of the assumed broader contact zone increased (S4 and S5 Table).

1340



1341 **Supplementary material references**

- 1342 1. Lloyd-Smith JO, Schreiber SJ, Kopp PE, Getz WM. Superspreading and the effect of  
1343 individual variation on disease emergence. Nature [Internet]. 2005;438(November):355–9.  
1344 Available from: <http://www.ncbi.nlm.nih.gov/pubmed/16292310>

1345

1346

## S1 Fig

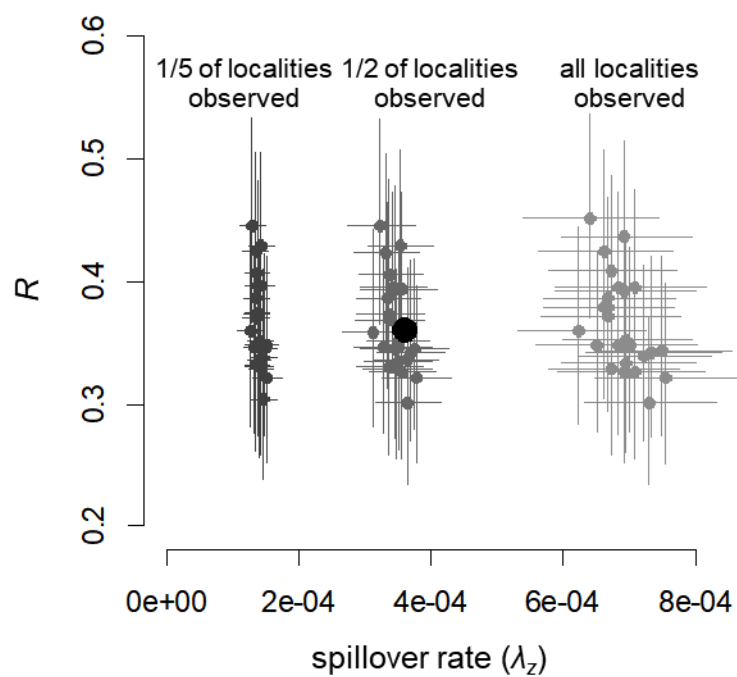

## S2 Fig

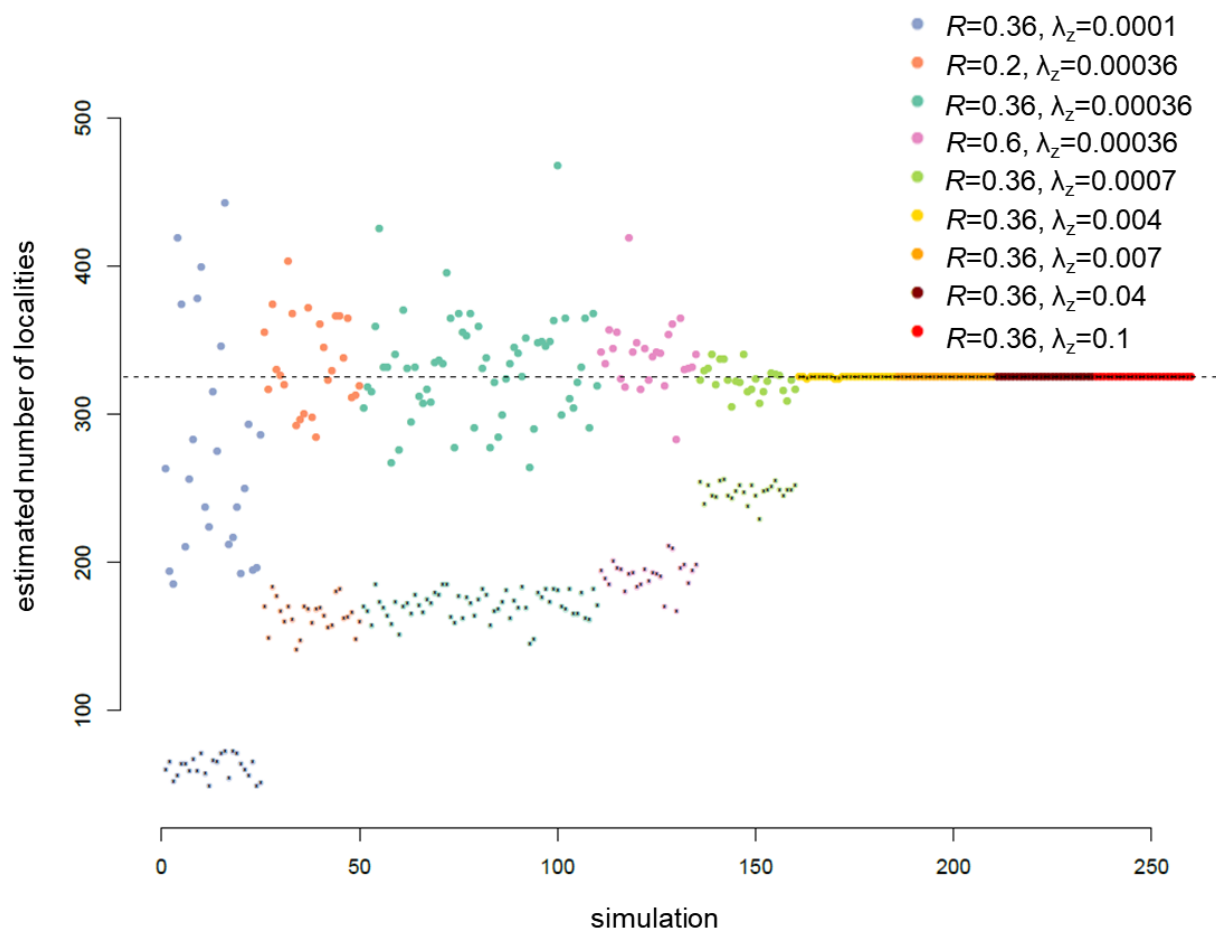

## S3 Fig

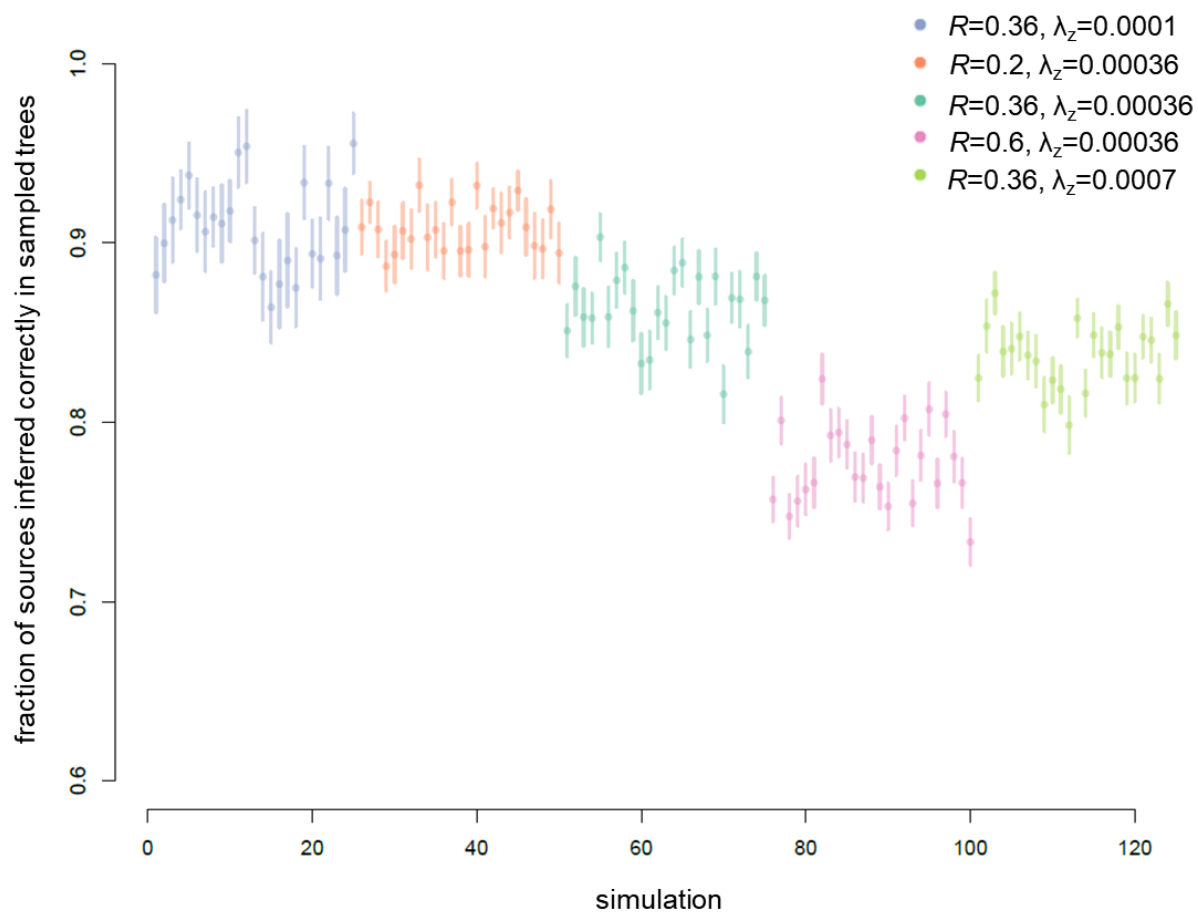

## S4 Fig

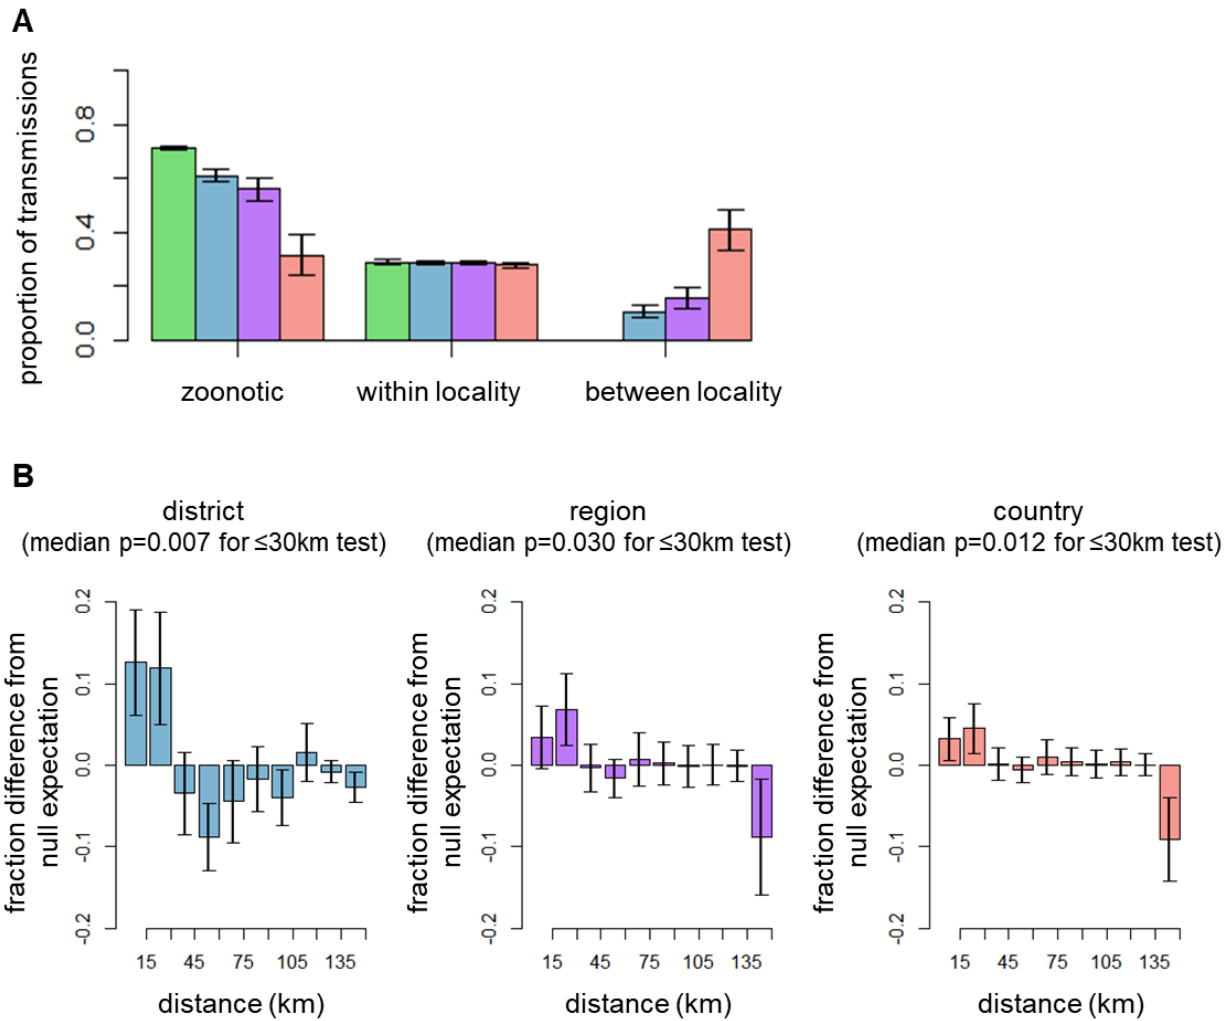

## S5 Fig

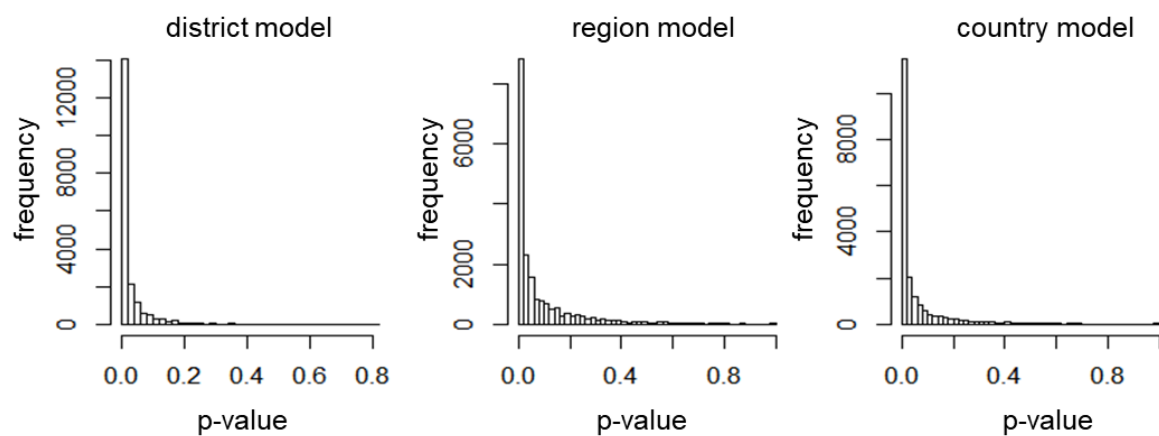

## S6 Fig

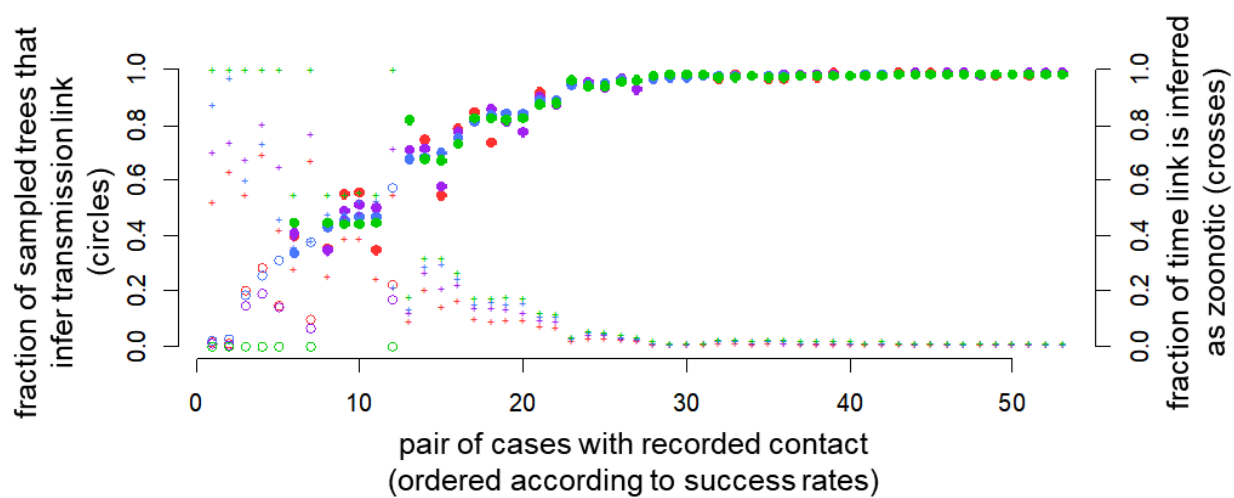

## S7 Fig

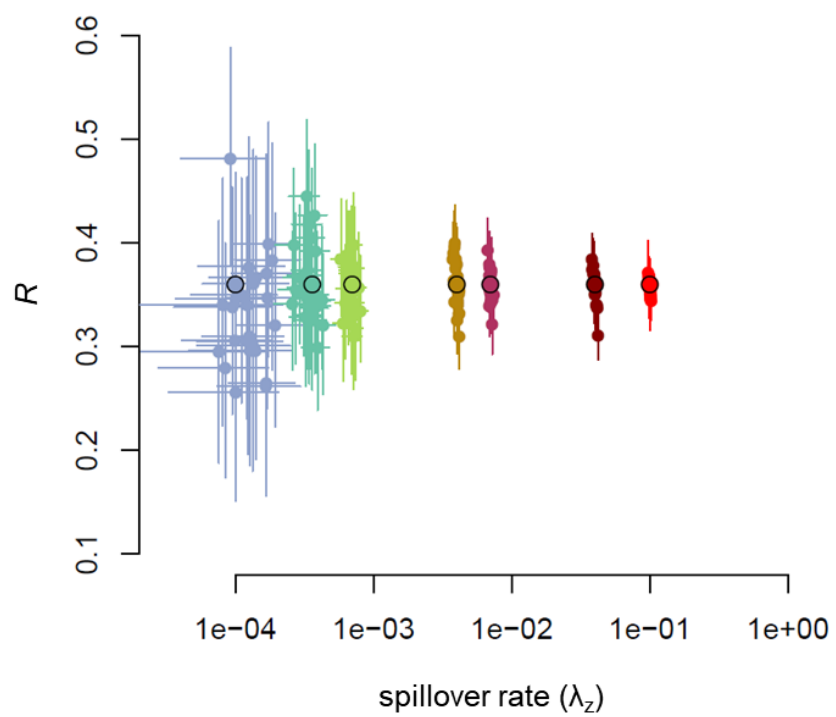



## S8 Fig

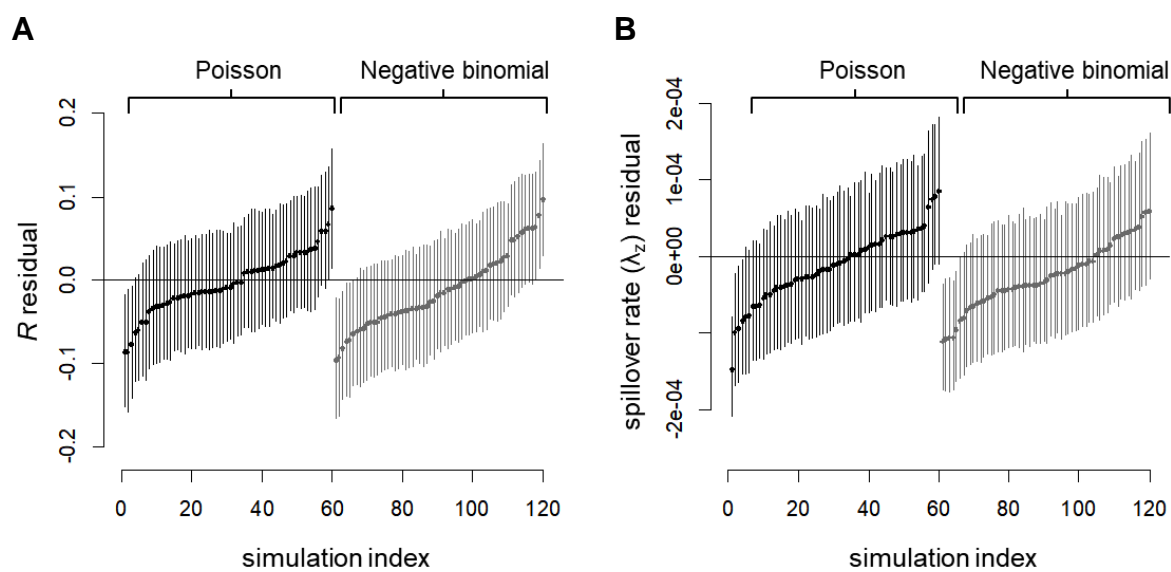

## S9 Fig

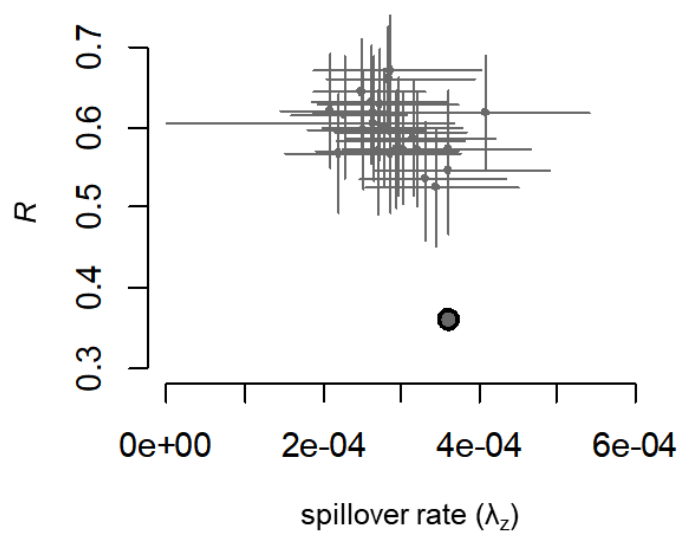

## S10 Fig

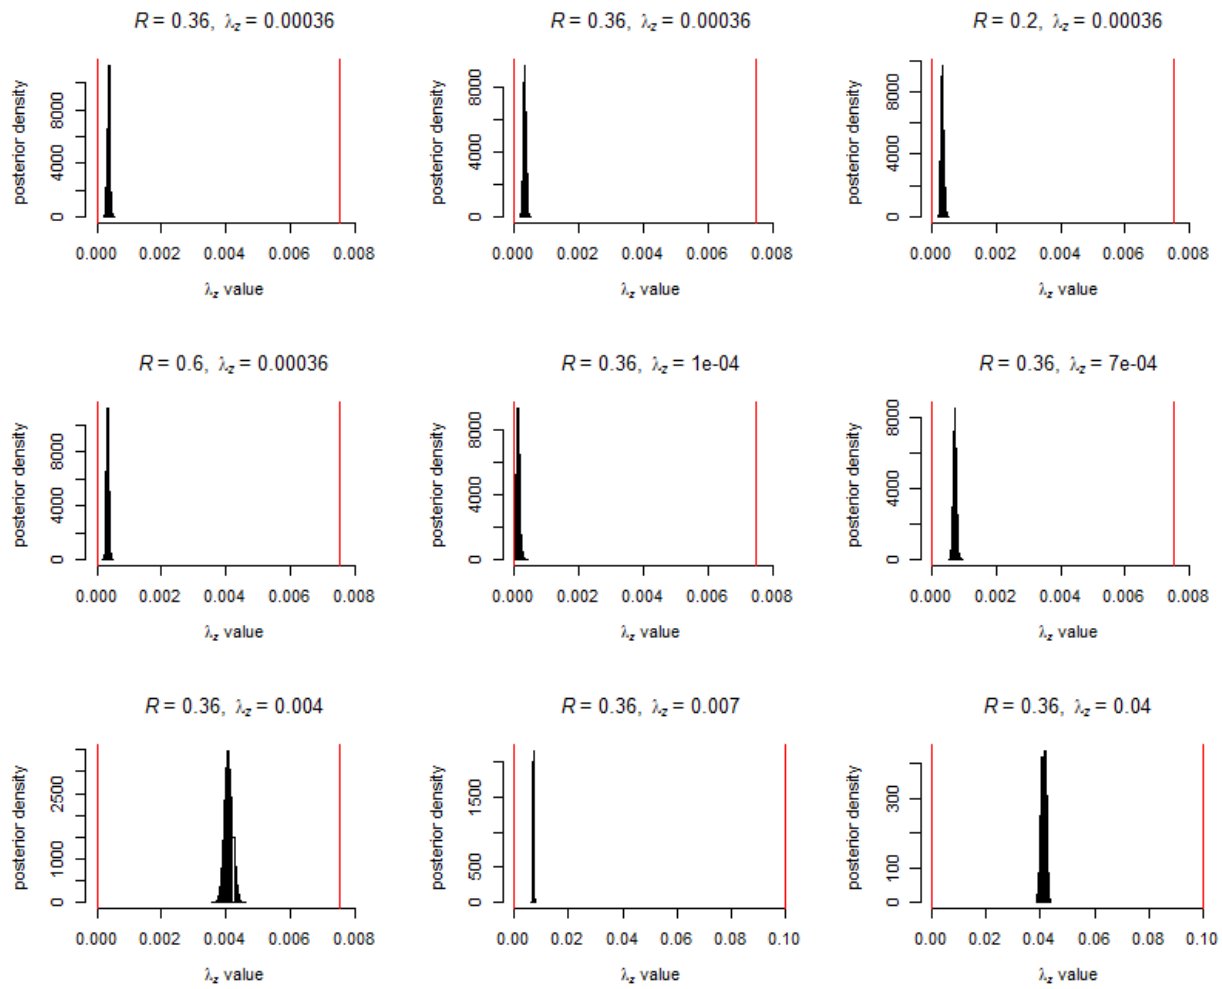

**S1 Table**

| Inference Approach                                           | $R$                                    |                    |                       | $\lambda_z$                            |                    |                       | $\sigma$                               |                    |                       |
|--------------------------------------------------------------|----------------------------------------|--------------------|-----------------------|----------------------------------------|--------------------|-----------------------|----------------------------------------|--------------------|-----------------------|
|                                                              | Fraction of 95% CIs include true value | Average error size | Average percent error | Fraction of 95% CIs include true value | Average error size | Average percent error | Fraction of 95% CIs include true value | Average error size | Average percent error |
| True number of localities known                              | 95.2% (119/125)                        | 0.0293             | 8.6%                  | 96.8% (121/125)                        | 1.99E-05           | 6.3%                  | 96.0% (120/125)                        | 0.0522             | 7.0%                  |
| Assume all localities are observed                           | 95.2% (119/125)                        | 0.0288             | 8.4%                  | 0.0% (0/125)                           | 3.30E-04           | 153.0%                | 94.4% (118/125)                        | 0.0575             | 7.7%                  |
| Corrected denominator method (account for silent localities) | 92.8% (116/125)                        | 0.0298             | 8.4%                  | 93.6% (117/125)                        | 3.59E-05           | 14.0%                 | 88.0% (110/125)                        | 0.0665             | 8.9%                  |

**S2 Table**

| True $\lambda_c$ value | $R$                                    |                    |                       |                     | $\lambda_c$                            |                    |                       |                     | $\sigma$                               |                    |                       |                     |
|------------------------|----------------------------------------|--------------------|-----------------------|---------------------|----------------------------------------|--------------------|-----------------------|---------------------|----------------------------------------|--------------------|-----------------------|---------------------|
|                        | Fraction of 95% CIs include true value | Average error size | Average percent error | Average width of CI | Fraction of 95% CIs include true value | Average error size | Average percent error | Average width of CI | Fraction of 95% CIs include true value | Average error size | Average percent error | Average width of CI |
| 0.0001                 | 96% (24/25)                            | 0.0458             | 12.7%                 | 0.226               | 96% (24/25)                            | 3.54 E-05          | 35.4%                 | 1.75 E-04           | 88% (22/25)                            | 0.1094             | 14.58%                | 0.395               |
| 0.00036                | 92% (23/25)                            | 0.0279             | 7.8%                  | 0.137               | 88% (22/25)                            | 3.68 E-05          | 10.2%                 | 1.72 E-04           | 84% (21/25)                            | 0.0587             | 7.83%                 | 0.239               |
| 0.0007                 | 100% (25/25)                           | 0.0213             | 5.9%                  | 0.108               | 96% (24/25)                            | 3.85 E-05          | 5.5%                  | 2.06 E-04           | 88% (22/25)                            | 0.0493             | 6.57%                 | 0.187               |
| 0.004                  | 88% (22/25)                            | 0.0173             | 4.8%                  | 0.068               | 96% (24/25)                            | 1.04 E-04          | 2.6%                  | 4.71 E-04           | 100% (25/25)                           | 0.0255             | 3.39%                 | 0.122               |
| 0.007                  | 92% (23/25)                            | 0.0121             | 3.4%                  | 0.060               | 96% (24/25)                            | 1.27 E-04          | 1.8%                  | 7.05 E-04           | 92% (23/25)                            | 0.0261             | 3.49%                 | 0.113               |
| 0.04                   | 92% (23/25)                            | 0.0121             | 3.4%                  | 0.050               | 92% (23/25)                            | 7.50 E-04          | 1.9%                  | 3.15 E-03           | 96% (24/25)                            | 0.0215             | 2.87%                 | 0.100               |
| 0.1                    | 100% (25/25)                           | 0.0071             | 2.0%                  | 0.038               | 100% (25/25)                           | 1.12 E-03          | 1.1%                  | 5.90 E-03           | 100% (25/25)                           | 0.0134             | 1.79%                 | 0.082               |

### S3 Table

| Offspring distribution            | $R$                                    |                    |                       | $\lambda_z$                            |                    |                       | $\sigma$                               |                    |                       |
|-----------------------------------|----------------------------------------|--------------------|-----------------------|----------------------------------------|--------------------|-----------------------|----------------------------------------|--------------------|-----------------------|
|                                   | Fraction of 95% CIs include true value | Average error size | Average percent error | Fraction of 95% CIs include true value | Average error size | Average percent error | Fraction of 95% CIs include true value | Average error size | Average percent error |
| Poisson                           | 91.7%<br>(55/60)                       | 0.0289             | 8.0%                  | 93.3%<br>(56/60)                       | 3.76E-05           | 10.4%                 | 83.3%<br>(50/60)                       | 0.0649             | 8.7%                  |
| Negative binomial<br>( $k=0.58$ ) | 86.7%<br>(52/60)                       | 0.0393             | 10.9%                 | 90.0%<br>(54/60)                       | 4.18E-05           | 11.6%                 | 91.7%<br>(55/60)                       | 0.0555             | 7.4%                  |

## S4 Table

| Model used for inference | mean $R$ | mean $\lambda_z$ |
|--------------------------|----------|------------------|
| District                 | 0.314    | 0.000346         |
| Region                   | 0.323    | 0.000343         |
| Country                  | 0.354    | 0.000328         |

## S5 Table

| Model used for inference | mean $R$ | mean $\lambda_z$ |
|--------------------------|----------|------------------|
| District                 | 0.348    | 0.000385         |
| Region                   | 0.357    | 0.000355         |
| Country                  | 0.379    | 0.000334         |



## S6 Table

| Inter-locality transmission rule                                                                                                           | Offspring distribution | True $R$ | True $\lambda_c$                                         | # datasets simulated |
|--------------------------------------------------------------------------------------------------------------------------------------------|------------------------|----------|----------------------------------------------------------|----------------------|
| Broader contact zone: district-level                                                                                                       | Poisson                | 0.36     | 0.00036                                                  | 60                   |
| Broader contact zone: district-level                                                                                                       | Poisson                | 0.2      | 0.00036                                                  | 25                   |
| Broader contact zone: district-level                                                                                                       | Poisson                | 0.6      | 0.00036                                                  | 25                   |
| Broader contact zone: district-level                                                                                                       | Poisson                | 0.36     | 0.0001                                                   | 25                   |
| Broader contact zone: district-level                                                                                                       | Poisson                | 0.36     | 0.0007                                                   | 25                   |
| Broader contact zone: district-level                                                                                                       | Poisson                | 0.36     | 0.004                                                    | 25                   |
| Broader contact zone: district-level                                                                                                       | Poisson                | 0.95     | 0.007                                                    | 25                   |
| Broader contact zone: district-level                                                                                                       | Poisson                | 0.36     | 0.04                                                     | 25                   |
| Broader contact zone: district-level                                                                                                       | Poisson                | 0.36     | 0.1                                                      | 25                   |
| Broader contact zone: district-level                                                                                                       | NBinom ( $k=0.58$ )    | 0.36     | 0.00036                                                  | 60                   |
| Broader contact zone: district-level                                                                                                       | Poisson                | 0.01     | 0.00036 (intensity heterogeneous through time and space) | 25                   |
| Localities have same spatial coordinates as recorded for DRC monkeypox localities, inter-locality transmission with closest 5 neighbors    | Poisson                | 0.36     | 0.00036                                                  | 25                   |
| Localities have same spatial coordinates as recorded for DRC monkeypox localities, inter-locality transmission with neighbors within 30 km | Poisson                | 0.36     | 0.00036                                                  | 25                   |

## S7 Table

| Symbol                      | Description                                                                                                                                                                   |
|-----------------------------|-------------------------------------------------------------------------------------------------------------------------------------------------------------------------------|
| $\mu_{t,v}$                 | Expected number of cases observed on day $t$ , in locality $v$                                                                                                                |
| $N_{t,v}$                   | Actual number of cases observed on day $t$ , in locality $v$                                                                                                                  |
| $N$                         | Actual number of cases observed across all localities over the course of surveillance                                                                                         |
| $V$                         | Total number of localities under surveillance                                                                                                                                 |
| $V_w$                       | Total number of localities under surveillance in the broader contact zone of locality $w$                                                                                     |
| $W$                         | Number of localities with one or more cases (the number of localities that appear in the surveillance dataset)                                                                |
| $W_w$                       | Number of localities with one or more cases in the broader contact zone of locality $w$                                                                                       |
| $T$                         | Duration of surveillance: number of days surveillance was conducted                                                                                                           |
| $\lambda_z$                 | Spillover rate: the expected number of spillover events per day in a given locality                                                                                           |
| $\lambda_{\{s,w\},\{t,v\}}$ | The expected number of new infections that become symptomatic on day $t$ in locality $v$ caused by an infectious individual who became symptomatic on day $s$ in locality $w$ |
| $R$                         | Reproductive number: the average number of secondary cases caused by an infectious individual                                                                                 |
| $\sigma$                    | Within-locality transmission proportion: the fraction of cases arising from human-to-human transmission that occur in the same locality as the source case                    |
